1 **AMPK mediates early activation of the unfolded protein response through a positive feedback**  
2 **loop in palmitate-treated muscle cells**

3 **Jing Gong<sup>1,2†</sup>, Lu Wang<sup>1†</sup>, Wuchen Tao<sup>1,2</sup>, Zonghan Liu<sup>1</sup>, Xiangsheng Pang<sup>1,2</sup>, Wenjiong Li<sup>1</sup>,**  
4 **Yaxuan Liu<sup>1,2</sup>, Xiaoping Chen<sup>1,2\*</sup>, Peng Zhang<sup>1\*</sup>**

5 <sup>1</sup>State Key Laboratory of Space Medicine Fundamentals and Application, China Astronaut Research  
6 and Training Center, Beijing, China

7 <sup>2</sup>National Key Laboratory of Human Factors Engineering, China Astronaut Research and Training  
8 Center, Beijing, China

9 <sup>†</sup>These authors have contributed equally to this work and share first authorship.

10 **\*Correspondence:**

11 Peng Zhang  
12 zhangpeng6128@163.com

13 Xiaoping Chen  
14 xpchen2009@163.com

15 **Abstract**

16 Activation of the unfolded protein response (UPR) is closely associated with the pathogenesis of many  
17 metabolic diseases including obesity and type 2 diabetes. There is increasing evidence for the  
18 interdependence of the UPR and metabolic signaling pathways. The AMP-activated protein kinase  
19 (AMPK) signaling pathway controls energy balance in eukaryotes. The aim of this study was to  
20 investigate the possible interaction between AMPK signaling and the UPR in muscle cells exposed to  
21 a saturated fatty acid, as well as the underlying mechanism. The UPR was induced in C2C12 myotubes  
22 by treatment with palmitate along with activation of AMPK signaling. Inhibiting the AMPK pathway  
23 with compound C attenuated palmitate-induced UPR activation, while inhibiting the UPR with  
24 taurourdodeoxycholic acid alleviated palmitate-induced AMPK activation, suggesting a positive  
25 feedback loop between the UPR and AMPK. Additionally, 5-amino-1- $\beta$ -D-ribofuranosylimidazole-4-  
26 carboxamide, an AMPK agonist, caused a dose- and time-dependent upregulation of genes related to  
27 the UPR, including activating transcription factor (ATF)4, binding immunoglobulin protein (BIP), and  
28 growth arrest and DNA damage-inducible protein (GADD)34. These results provide the first evidence  
29 for the involvement of AMPK signaling in the early activation of the UPR induced by saturated fatty  
30 acid in skeletal muscle, and suggest that physiologic or pharmacologic activation of the AMPK  
31 pathway (ie, by exercise or metformin, respectively) can promote skeletal muscle health and function  
32 and thus improve quality of life for individuals with metabolic disorder due to a high-fat diet or obesity.

33 **Keywords: palmitate, ER stress, unfolded protein response, AMPK, myotube.**

34

35 **1 Introduction**

36 Adult skeletal muscle shows considerable plasticity that allows a rapid response under a variety of  
37 physiologic and pathologic conditions [1], which is facilitated by the sarcoplasmic reticulum, a

38 specialized form of the endoplasmic reticulum (ER) [2]. Environmental or cell-intrinsic stimuli such  
39 as nutrient or oxygen deprivation, exposure to toxic substances, and oxidative stress can disrupt cellular  
40 homeostasis and induce ER stress, which leads to activation of the unfolded protein response (UPR)  
41 [3-5]. The canonical UPR in mammals is initiated by activation of 3 major ER transmembrane  
42 sensors—namely, PKR-like endoplasmic reticulum kinase (PERK), activating transcription factor  
43 (ATF)6, and inositol-requiring enzyme (IRE)1 [6-8]—that trigger the expression of downstream  
44 transcription factors (eg, ATF4, ATF6c, C/EBP homologous protein [CHOP], and spliced X-box  
45 binding protein 1 [XBP1s]). The main outcome of UPR signaling—specifically, of the early phase of  
46 the UPR—is the restoration of ER homeostasis through inhibition of protein synthesis or upregulation  
47 of ER chaperone proteins [9, 10]. However, prolonged UPR due to continuous stress can lead to the  
48 induction of apoptotic cell death [11, 12]. Thus, the UPR is a cellular mechanism that controls cell fate  
49 in response to stress.

50 ER stress and the UPR also can be activated in skeletal muscles exposed to metabolic stress, as occurs  
51 in diabetic patients [13] or by consumption of a high-fat diet [14, 15]. The high concentration of free  
52 fatty acids (especially saturated fatty acids [SFAs]) in plasma under these conditions is one of the main  
53 factors that trigger the UPR in skeletal muscle [16-18]. The UPR is closely associated with SFA-  
54 induced inflammation, autophagy, insulin resistance, and apoptosis in skeletal muscle [18-20],  
55 implying crosstalk between the UPR and signaling pathways that regulate metabolism [21, 22]. The  
56 AMP-activated protein kinase (AMPK) pathway, which is conserved across eukaryotes, integrates  
57 signals from multiple sources to control cellular energy balance. There is increasing evidence for the  
58 interaction of AMPK signaling with the UPR [23-30], but the mechanistic basis for the crosstalk  
59 between these two pathways has yet to be elucidated in different models of ER stress.

60 In this study we investigated whether there is crosstalk between AMPK signaling and the UPR induced  
61 by palmitate in skeletal muscle cells, as well as the possible underlying mechanism. We found that  
62 AMPK was activated in myotubes in response to treatment with the palmitate. Moreover, we showed  
63 that AMPK signaling crosstalks with early activation of the UPR via a positive feedback mechanism.  
64 Additionally, the AMPK agonist 5-amino-1- $\beta$ -D-ribofuranosylimidazole-4-carboxamide (AICAR)  
65 induced mild UPR. These findings provide insight into the interactions between metabolic signals and  
66 homeostatic mechanisms in skeletal muscle cells that may be perturbed in metabolic disorders.

## 67 **2 Materials and methods**

### 68 **2.1 Cell culture**

69 Mouse C2C12 myoblast cells were cultured in high-glucose Dulbecco's modified Eagle medium  
70 (DMEM) (Gibco, Grand Island, NY, USA) supplemented with 10% fetal bovine serum (FBS) (Sigma-  
71 Aldrich, St. Louis, MO, USA) and 1% antibiotics (100 U/ml penicillin and 0.1 mg/ml streptomycin;  
72 Gibco) at 37°C in a 5% CO<sub>2</sub> atmosphere. When the cells reached 80%–90% confluence, the medium  
73 was replaced with high-glucose DMEM containing 2% horse serum (Gibco), which was changed daily.  
74 C2C12 myotubes were used for experiments after 5 days of differentiation.

### 75 **2.2 Experimental treatments**

76 Palmitate (Sigma-Aldrich; cat. no. P0500) was dissolved in ethanol and diluted to 500  $\mu$ mol/l in  
77 DMEM containing 2% AlbumiNZ bovine serum albumin (MP Biomedicals, Solon, OH, USA; cat. no.  
78 199896), 2% FBS (Atlanta Biologicals, Flowery Branch, GA, USA), 2 mmol/l L-carnitine (Sigma-  
79 Aldrich; cat. no. C0283), and 1% antibiotics [31]. Control cells were incubated in the same medium  
80 except that palmitate was substituted with an equal volume of ethanol. In some treatment conditions,

81 10  $\mu\text{mol/l}$  compound C (prepared in dimethylsulfoxide [DMSO]; Sigma-Aldrich) was coincubated  
82 with palmitate for 12 h; DMSO was also used as a vehicle control for the treatments. To inhibit ER  
83 stress, C2C12 myotubes were pretreated for 1 h with 1 mM taurourdodeoxycholic acid (TUDCA)  
84 (Millipore, Billerica, MA, USA; cat. no. 580549) before adding palmitate for another 12 h. To activate  
85 AMPK signaling, AICAR (Sigma-Aldrich; cat. no. A9978) was added to the myotubes at a final  
86 concentration of 0.125–2 mmol/l for different times.

### 87 **2.3 RNA extraction and real-time (RT-)PCR**

88 Total RNA was extracted from C2C12 myotubes using TRIzol reagent (Invitrogen, Carlsbad, CA, USA;  
89 cat. no. 15596-026). RNA concentration and quality were verified using a Bio Photometer (Eppendorf,  
90 Hamburg, Germany). The PrimeScript RT reagent kit (Takara Bio, Otsu, Japan; cat. no. RR037A) was  
91 used to reverse transcribe total RNA (2  $\mu\text{g}$ ) into cDNA with random hexamer primers. RT-PCR was  
92 performed on a StepOnePlus RT-PCR system (Invitrogen) with fast SYBR Green Master Mix (Applied  
93 Biosystems, Foster City, CA, USA; cat. no. 4385612). Each RT-PCR mixture (final reaction  
94 volume=50  $\mu\text{l}$ ) contained 21  $\mu\text{l}$  sterile water, 25  $\mu\text{l}$  SYBR Green, 2  $\mu\text{l}$  cDNA (500 ng/ $\mu\text{l}$ ), and 1  $\mu\text{l}$  each  
95 of forward and primers (10 pmol/ $\mu\text{l}$ ). The reaction conditions were as follows: denaturation at 95°C  
96 for 10 s, annealing at the melting temperature of the specific primer set for 15 s, elongation at 72°C for  
97 20 s, and a melting curve step. Target gene expression levels were normalized to that of the 18S rRNA  
98 gene. The following forward and reverse primers were used: BIP, 5'-  
99 AAACCAAGACATTTGCCCCAG-3' and 5'-AGACACATCGAAGGTGCCG-3'; CHOP, 5'-  
100 CCTAGCTTGGCTGACAGAGG-3' and 5'-CTGCTCCTTCTCCTTCATGC-3'; ATF4, 5'-  
101 GGAATGGCCGGCTATGG-3' and 5'-TCCCGGAAAAGGCATCCT-3'; growth arrest and DNA  
102 damage-inducible protein (GADD)34, 5'-CGGAAGGTACTTTCGCTGA-3' and 5'-  
103 CGGACTGTGGAAGAGATGGG-3'; XBP1s, 5'-GAGTCCGCAGCAGGTG-3' and 5'-  
104 GTGTCAGAGTCCATGGGA-3'; unspliced XBP1 (XBP1u), 5'-AAGAACACGCTTGGGAATGG-3'  
105 and 5'-ACTCCCCTTGGCCTCCAC-3'; and 18S rRNA, 5'-CCAGAGCGAAAGCATTGCCAAGA-  
106 3' and 5'-TCGGCATCGTTTATGGTTCGGAAG-3'.

### 107 **2.4 Immunoblotting**

108 C2C12 myotubes were lysed in radioimmunoprecipitation assay buffer (Merck, Darmstadt, Germany)  
109 with complete EDTA-free protease and phosphatase inhibitors (Roche, Basel, Switzerland; cat. no.  
110 04906845001). The supernatant was collected by centrifugation at 12,000 $\times g$  for 10 min at 4°C and the  
111 protein concentration was determined using a microplate reader (Thermo Fisher Scientific, Waltham,  
112 MA, USA). Equal amounts of extracted protein (30  $\mu\text{g}$  per lane) were denatured with gel loading buffer  
113 after centrifugation to remove insoluble material and separated by sodium dodecyl sulfate–  
114 polyacrylamide gel electrophoresis. The proteins were transferred to a nitrocellulose membrane that  
115 was blocked in 5% nonfat milk diluted in Tris-buffered saline with 0.1% Tween 20 (TBST) for 2 h and  
116 then incubated overnight at 4°C with primary antibodies against CHOP (cat. no. 5554), ATF4 (cat. no.  
117 11815), AMPK $\alpha$  (cat. no. 2532), p-AMPK $\alpha$  (cat. no. 2531) (all from Cell Signaling Technology,  
118 Danvers, MA, USA), and  $\beta$ -actin (Santa Cruz Biotechnology, Santa Cruz, CA, USA; cat. no. sc130656).  
119 The following day, the membrane was washed 3 times with TBST and incubated for 2 h at room  
120 temperature with secondary antibodies in 5% nonfat milk, followed by incubation with enhanced  
121 chemiluminescence reagent (Thermo Fisher Scientific; cat. no. 34580) in a dark room. Protein bands  
122 were quantified using Image-Pro Plus v6.0 software (Media Cybernetics, Rockville, MD, USA); the  
123 intensity of the protein signal was normalized to that of  $\beta$ -actin.

### 124 **2.5 Statistical analysis**

125 Data are presented as mean  $\pm$  SD. One-way analysis of variance followed by the Bonferroni posthoc  
126 test was used to compare the means of multiple groups using Prism v8.0 software (GraphPad, La Jolla,  
127 CA, USA).  $P \leq 0.05$  was considered statistically significant.

### 128 **3 Results**

#### 129 **3.1 AMPK signaling is activated in the early stage of the UPR in myotubes**

130 We investigated AMPK phosphorylation status and the expression of UPR markers in C2C12  
131 myotubes treated with palmitate (a major component of dietary saturated fats) for different times.  
132 While total AMPK $\alpha$  levels remained constant over time, AMPK $\alpha$  phosphorylation was increased after  
133 3 h of palmitate treatment, reaching a peak after 12 h; however, after 24 h, p-AMPK $\alpha$  level was lower  
134 than that in the control group (Figure 1A). The expression of UPR markers such as CHOP, ATF4, and  
135 XBP1s was also upregulated after 3 h of palmitate treatment and peaked at 12 h (Figure 1B). These  
136 results indicate that activation of AMPK signaling is closely associated with early activation of UPR  
137 induced by palmitate in myotubes.

#### 138 **3.2 AMPK signaling is involved in palmitate-induced UPR in myotubes**

139 To clarify the interaction between the AMPK pathway and UPR, we treated C2C12 myotubes with  
140 palmitate for 12 h with or without compound C, a widely used specific inhibitor of AMPK. As expected,  
141 multiple factors involved in the UPR including ATF4, CHOP, GADD34, chaperone BIP, XBP1u, and  
142 XBP1s were upregulated by palmitate, as determined by RT-PCR (Fig. 2A); this was accompanied by  
143 increased AMPK $\alpha$  phosphorylation (Fig. 2B). AMPK inhibition by treatment with compound C  
144 abrogated the palmitate-induced upregulation of UPR markers (Fig. 2A). In agreement with the above  
145 findings, palmitate induced a marked increase in ATF4 and CHOP protein levels, which was partly  
146 abrogated by treatment with compound C (Fig. 2B). As a control, we confirmed that compound C  
147 completely abolished AMPK activation induced by palmitate (Fig. 2B). These data indicate that  
148 activation of AMPK signaling contributes to the early activation of the UPR induced by palmitate.

#### 149 **3.3 Inhibition of the UPR with TUDCA attenuates palmitate-induced AMPK activation**

150 We further investigated whether inhibiting the UPR alters AMPK activation in C2C12 myotubes. The  
151 myotubes were pretreated with the UPR inhibitor TUDCA for 1 h before adding palmitate for 12 h.  
152 TUDCA significantly attenuated the palmitate-induced upregulation of ATF4 and CHOP (Fig. 3),  
153 confirming the pharmacologic inhibition of the UPR. Interestingly, TUDCA also abolished palmitate-  
154 induced AMPK $\alpha$  phosphorylation (Fig. 3), suggesting a positive feedback loop between the UPR and  
155 AMPK pathway in the early stage of palmitate treatment in muscle cells.

#### 156 **3.4 Pharmacologic activation of AMPK signaling induces mild UPR**

157 Given our finding that AMPK activation contributes to palmitate-induced UPR, we speculated that  
158 pharmacologic activation of AMPK would be sufficient to induce the UPR in C2C12 myotubes. To  
159 test our hypothesis, C2C12 myotubes were treated with the AMPK agonist AICAR at concentrations  
160 ranging from 0.125–2 mM for 12 h to activate AMPK signaling. AMPK phosphorylation increased  
161 with AICAR concentration and was highest at 1 mM AICAR (Fig. 4A). Meanwhile, ATF4, GADD34,  
162 and BIP were upregulated by AICAR in a dose-dependent manner at concentrations  $< 1$  mM (Fig. 4B).  
163 A higher concentration of AICAR (2 mM) failed to induce AMPK activation to a greater extent than 1  
164 mM, and the same was true for ATF4 and BIP expression (Fig. 4B). However, GADD34 was further  
165 upregulated whereas CHOP and XBP1u were downregulated by treatment with 2 mM AICAR (Fig.



166 4B). We also examined the effect of incubation time with AICAR (1 mM) on the UPR. After 6 h of  
167 treatment, there was significant activation of AMPK (Fig. 4C) while ATF4, GADD34, and BIP  
168 expression increased over time and was significantly higher after 12 h (Fig. 4D). These data indicate  
169 that pharmacologic activation of AMPK is sufficient to induce the UPR in myotubes—specifically  
170 ATF4, GADD34, and BIP—in a dose- and time-dependent manner.

#### 171 4 Discussion

172 The results of this study provide novel evidence for the interaction between the AMPK pathway and  
173 UPR in muscle cells exposed to palmitate, a major component of dietary saturated fats [32].  
174 Specifically, we first observed unexpected activation of AMPK signaling within 12 h of palmitate  
175 treatment, which was accompanied by acute induction of the UPR. In support of our findings, a  
176 previous report showed that peroxisome proliferator-activated receptor gamma coactivator (PGC)-  
177 1 $\alpha$ —one of the main downstream target genes of the AMPK pathway—was transiently upregulated  
178 after 4 and 8 h of palmitate treatment [33]. However, another study found that the AMPK pathway was  
179 inhibited in cells treated with palmitate for 16 h [18]. We speculate that this discrepancy is due to  
180 differences in treatment duration, especially given that changes induced by palmitate occur much more  
181 rapidly and are more dramatic in vitro than those observed in clinical obesity or induced by a high-fat  
182 diet. In fact, we also found that p-AMPK $\alpha$  was downregulated in cells exposed to palmitate for 24 h.

183 The association between the UPR and AMPK has been previously investigated [24, 34-37]. Some  
184 studies on palmitate-induced ER stress have demonstrated an inhibitory effect of AMPK signaling on  
185 the UPR in different tissues and cells [24, 34, 37]. For instance, pharmacologic activation of AMPK  
186 with AICAR was shown to suppress palmitate-induced ER stress in rat vascular endothelial cells  
187 [27](Li et al., 2015). In C2C12 myotubes, both GW501516 (a peroxisome proliferator-activated  
188 receptor [PPAR] $\delta$  receptor agonist) and oleate blocked palmitate-induced ER stress through an AMPK-  
189 dependent mechanism [18, 38]. Similarly, 5-lipoxygenase protected C2C12 myotubes from palmitate-  
190 induced ER stress via AMPK activation [39]. AMPK activation with AICAR (2 mM) effectively  
191 attenuated palmitate-induced ER stress in muscle cells [24]. However, our data showed that inhibiting  
192 the AMPK pathway with compound C attenuated the UPR induced by palmitate in myotubes,  
193 demonstrating a stimulatory effect of the AMPK pathway on palmitate-induced UPR. In agreement  
194 with our findings, the antidiabetic drug phenformin was shown to activate ER stress in an AMPK-  
195 dependent manner, while AMPK deficiency completely abolished phenformin-induced UPR [40].  
196 Similarly, it was reported that AMPK activation induced mild UPR in C3H10T1/2 mouse  
197 mesenchymal stem cells [28]. We also demonstrated that inhibiting the UPR mitigated palmitate-  
198 induced AMPK activation, indicating a positive feedback loop between AMPK and the UPR in the  
199 early stage of palmitate treatment in muscle cells. This is the first report of a positive feedback  
200 regulation mechanism between the AMPK pathway and the UPR.

201 Interestingly, we also found that pharmacologic AMPK activation with AICAR was sufficient to  
202 induce the upregulation of UPR components in myotubes. In line with this finding, PGC-1 $\alpha$  was shown  
203 to induce the expression of a variety of UPR-related genes in skeletal muscle [29]. Moreover, ER stress  
204 markers (eg, ATF3 and CHOP) and chaperones (eg, BIP and GRP94) were significantly unregulated  
205 in gastrocnemius muscle from transgenic mice with muscle-specific overexpression of PGC-1 $\alpha$  [34].  
206 PGC-1 $\alpha$  overexpression also induced the expression of genes related to protein folding and the  
207 response to unfolded proteins in primary myotubes [6]. The increased expression of BIP and GADD34  
208 caused by exercise was abolished in muscle-specific PGC-1 $\alpha$  knockout mice, demonstrating that PGC-  
209 1 $\alpha$  is important for the UPR in skeletal muscle [15]. Given the essential role of PGC-1 $\alpha$  as an effector  
210 of the AMPK signaling pathway and its upregulation in the period soon after palmitate treatment [33],

211 we speculate that PGC-1 $\alpha$  is involved in the early activation of palmitate-induced ER stress in skeletal  
212 muscle.

213 In summary, we reported here the bidirectional crosstalk between AMPK signaling and early activation  
214 of the UPR in myotubes exposed to an SFA. We also showed that pharmacologic activation of AMPK  
215 was sufficient to induce a mild UPR in skeletal muscle cells. Our findings demonstrate an essential  
216 role for the AMPK pathway in restoring ER homeostasis through activation of the UPR in response to  
217 metabolic stress, which can guide the development of new strategies for the treatment of diseases such  
218 as obesity and diabetes through improvement of skeletal muscle metabolism.

## 219 **5 Conflict of Interest**

220 The authors declare that the research was conducted in the absence of any commercial or financial  
221 relationships that could be construed as a potential conflict of interest.

## 222 **6 Author Contributions**

223 PZ and XC conceived the project and designed the study. JG, LW, ZL, XP, WT, and WL carried out  
224 the experiments. PZ, JG, WL, and YL analyzed the data. PZ, JG, LW, and XC wrote the manuscript.  
225 All authors read and approved the final version of the manuscript.

## 226 **7 Funding**

227 This work was supported by grants from the National Natural Science Foundation of China (no.  
228 81871522, 81772016 and 11727813) and the State Key Laboratory Grant of Space Medicine  
229 Fundamentals and Application (no. SMFA18B01).

## 230 **8 Acknowledgments**

231 Not applicable.

## 232 **9 References**

233 [1] Bohnert KR, McMillan JD, Kumar A. Emerging roles of ER stress and unfolded protein response  
234 pathways in skeletal muscle health and disease. *J Cell Physiol.* 2018;233:67-78.  
235 <https://doi.org/10.1002/jcp.25852>.

236 [2] Gallot YS, Bohnert KR. Confounding Roles of ER Stress and the Unfolded Protein Response in  
237 Skeletal Muscle Atrophy. *Int J Mol Sci.* 2021;22:2567. <https://doi.org/10.3390/ijms22052567>.

238 [3] Maekawa H, Inagi R. Stress Signal Network between Hypoxia and ER Stress in Chronic Kidney  
239 Disease. *Front Physiol.* 2017;8:74. <https://doi.org/10.3389/fphys.2017.00074>.

240 [4] Qi M, Dang Y, Xu Q, Yu L, Liu C, Yuan Y, et al. Microcystin-LR induced developmental toxicity  
241 and apoptosis in zebrafish (*Danio rerio*) larvae by activation of ER stress response. *Chemosphere.*  
242 2016;157:166-73. <https://doi.org/10.1016/j.chemosphere.2016.05.038>.

243 [5] Szpigiel A, Hainault I, Carlier A, Venticlef N, Batto AF, Hajduch E, et al. Lipid environment  
244 induces ER stress, TXNIP expression and inflammation in immune cells of individuals with type 2  
245 diabetes. *Diabetologia.* 2018;61:399-412. <https://doi.org/10.1007/s00125-017-4462-5>.

- 246 [6] Liu CY, Hsu CC, Huang TT, Lee CH, Chen JL, Yang SH, et al. ER stress-related ATF6 upregulates  
247 CIP2A and contributes to poor prognosis of colon cancer. *Mol Oncol*. 2018;12:1706-1717.  
248 <https://doi.org/10.1002/1878-0261.12365>.
- 249 [7] Ma Y, Brewer JW, Diehl JA, Hendershot LM. Two distinct stress signaling pathways converge  
250 upon the CHOP promoter during the mammalian unfolded protein response. *Journal of Molecular*  
251 *Biology*. 2002;318:1351-1365. [https://doi.org/10.1016/s0022-2836\(02\)00234-6](https://doi.org/10.1016/s0022-2836(02)00234-6).
- 252 [8] Wang P, Li J, Tao J, Sha B. The luminal domain of the ER stress sensor protein PERK binds  
253 misfolded proteins and thereby triggers PERK oligomerization. *J Biol Chem*. 2018;293:4110-4121.  
254 <https://doi.org/10.1074/jbc.RA117.001294>.
- 255 [9] Rutkowski DT, Hegde RS. Regulation of basal cellular physiology by the homeostatic unfolded  
256 protein response. *J Cell Biol*. 2010;189:783-794. <https://doi.org/10.1083/jcb.201003138>.
- 257 [10] Wang BC, Zhang ST, Chen G. Research Progress of the UPR Mechanism and its Effect on  
258 Improving Foreign Protein Expression. *Protein Pept Lett*. 2020;27:831-40.  
259 <https://doi.org/10.2174/0929866527666200407113549>.
- 260 [11] Pinkaew D, Chattopadhyay A, King MD, Chunhacha P, Liu ZH, Stevenson HL, et al. Fortilin  
261 binds IRE1 alpha and prevents ER stress from signaling apoptotic cell death. *Nature Communications*.  
262 2017;8:18. <https://doi.org/10.1038/s41467-017-00029-1>.
- 263 [12] Zhu Y, Xie M, Meng Z, Leung LK, Chan FL, Hu X, et al. Knockdown of TM9SF4 boosts ER  
264 stress to trigger cell death of chemoresistant breast cancer cells. *Oncogene*. 2019;38:5778-5791.  
265 <https://doi.org/10.1038/s41388-019-0846-y>.
- 266 [13] Liu J, Wu X, Franklin JL, Messina JL, Hill HS, Moellering DR, et al. Mammalian Tribbles  
267 homolog 3 impairs insulin action in skeletal muscle: role in glucose-induced insulin resistance. *Am J*  
268 *Physiol Endocrinol Metab*. 2010;298:E565-576. <https://doi.org/10.1152/ajpendo.00467.2009>.
- 269 [14] Sun JL, Park J, Lee T, Ji HJ, Jung TW. DEL-1 ameliorates high-fat diet-induced insulin resistance  
270 in mouse skeletal muscle through SIRT1/SERCA2-mediated ER stress suppression. *Biochem*  
271 *Pharmacol*. 2019;171:113730. <https://doi.org/10.1016/j.bcp.2019.113730>.
- 272 [15] Varone E, Pozzer D, Di Modica S, Chernorudskiy A, Nogara L, Baraldo M, et al. SELENON  
273 (SEPN1) protects skeletal muscle from saturated fatty acid-induced ER stress and insulin resistance.  
274 *Redox Biol*. 2019;24:101176. <https://doi.org/10.1016/j.redox.2019.101176>.
- 275 [16] Ebersbach-Silva P, Poletto AC, David-Silva A, Seraphim PM, Anhe GF, Passarelli M, et al.  
276 Palmitate-induced Slc2a4/GLUT4 downregulation in L6 muscle cells: evidence of inflammatory and  
277 endoplasmic reticulum stress involvement. *Lipids Health Dis*. 2018;17:64.  
278 <https://doi.org/10.1186/s12944-018-0714-8>.
- 279 [17] Peng G, Li L, Liu Y, Pu J, Zhang S, Yu J, et al. Oleate blocks palmitate-induced abnormal lipid  
280 distribution, endoplasmic reticulum expansion and stress, and insulin resistance in skeletal muscle.  
281 *Endocrinology*. 2011;152:2206-2218. <https://doi.org/10.1210/en.2010-1369>.
- 282 [18] Salvadó, L, Coll T, Gómez-Foix AM, Salmerón, E, Barroso E, Palomer X, et al. Oleate prevents  
283 saturated-fatty-acid-induced ER stress, inflammation and insulin resistance in skeletal muscle cells  
284 through an AMPK-dependent mechanism. *Diabetologia*. 2013;56:1372-1382.  
285 <https://doi.org/10.1007/s00125-013-2867-3>.
- 286 [19] Liong S, Lappas M. Endoplasmic reticulum stress regulates inflammation and insulin resistance  
287 in skeletal muscle from pregnant women. *Mol Cell Endocrinol*. 2016;425:11-25.  
288 <https://doi.org/10.1016/j.mce.2016.02.016>.

- 289 [20] Reddy SS, Shruthi K, Joy D, Reddy GB. 4-PBA prevents diabetic muscle atrophy in rats by  
290 modulating ER stress response and ubiquitin-proteasome system. *Chem Biol Interact.* 2019;306:70-77.  
291 <https://doi.org/10.1016/j.cbi.2019.04.009>.
- 292 [21] Yang BW, Qin Q, Xu L, Lv X, Liu Z, Song E, Song Y. Polychlorinated Biphenyl Quinone  
293 Promotes Atherosclerosis through Lipid Accumulation and Endoplasmic Reticulum Stress via CD36.  
294 *Chem Res Toxicol.* 2020;33:1497-1507. <https://doi.org/10.1021/acs.chemrestox.0c00123>.
- 295 [22] Yao S, Tian H, Miao C, Zhang DW, Zhao L, Li Y, et al. D4F alleviates macrophage-derived foam  
296 cell apoptosis by inhibiting CD36 expression and ER stress-CHOP pathway. *Journal of Lipid Research.*  
297 2015;56:836-847. <https://doi.org/10.1194/jlr.M055400>.
- 298 [23] Behera S, Kapadia B, Kain V, Alamuru-Yellapragada NP, Murunikkara V, Kumar ST, Babu PP,  
299 et al. ERK1/2 activated PHLPP1 induces skeletal muscle ER stress through the inhibition of a novel  
300 substrate AMPK. *Biochimica Et Biophysica Acta Molecular Basis of Disease Bba.* 2018;186:1702-  
301 1716. <https://doi.org/10.1016/j.bbadis.2018.02.019>.
- 302 [24] Huang Y, Li Y, Liu Q, Zhang J, Zhang Z, Wu T, et al. Telmisartan attenuates obesity-induced  
303 insulin resistance via suppression of AMPK mediated ER stress. *Biochem Biophys Res Commun.*  
304 2020;523:787-794. <https://doi.org/10.1016/j.bbrc.2019.12.111>.
- 305 [25] Hwang HJ, Jung TW, Choi JH, Lee HJ, Chung HS, Seo JA, et al. Knockdown of sestrin2 increases  
306 pro-inflammatory reactions and ER stress in the endothelium via an AMPK dependent mechanism.  
307 *Biochim Biophys Acta Mol Basis Dis.* 2017;1863:1436-44.  
308 <https://doi.org/10.1016/j.bbadis.2017.02.018>.
- 309 [26] Jung TW, Kim HC, Abd El-Aty AM, Jeong JH. Maresin 1 attenuates NAFLD by suppression of  
310 endoplasmic reticulum stress via AMPK-SERCA2b pathway. *J Biol Chem.* 2018;293:3981-3988.  
311 <https://doi.org/10.1074/jbc.RA117.000885>.
- 312 [27] Li J, Wang Y, Wang Y, Wen X, Ma XN, Chen W, et al. Pharmacological activation of AMPK  
313 prevents Drp1-mediated mitochondrial fission and alleviates endoplasmic reticulum stress-associated  
314 endothelial dysfunction. *Journal of Molecular & Cellular Cardiology.* 2015;86:62-74.  
315 <https://doi.org/10.1016/j.yjmcc.2015.07.010>.
- 316 [28] Son HE, Min HY, Kim EJ, Jang WG. Fat Mass and Obesity-Associated (FTO) Stimulates  
317 Osteogenic Differentiation of C3H10T1/2 Cells by Inducing Mild Endoplasmic Reticulum Stress via  
318 a Positive Feedback Loop with p-AMPK. *Molecules and Cells.* 2020;43:58-65.  
319 <https://doi.org/10.14348/molcells.2019.0136>.
- 320 [29] Wu J, Ruas JL, Estall JL, Rasbach KA, Choi JH, Li Y, et al. The unfolded protein response  
321 mediates adaptation to exercise in skeletal muscle through a PGC-1 $\alpha$ /ATF6 $\alpha$  complex. *Cell*  
322 *Metabolism.* 2011;13:160-169. <https://doi.org/10.1016/j.cmet.2011.01.003>.
- 323 [30] Liu JQ, Zhang L, Yao J, Yao S, Yuan T. AMPK alleviates endoplasmic reticulum stress by  
324 inducing the ER-chaperone ORP150 via FOXO1 to protect human bronchial cells from apoptosis.  
325 *Biochemical & Biophysical Research Communications.* 2018; 497:564-570.  
326 <https://doi.org/10.1016/j.bbrc.2018.02.095>.
- 327 [31] Woodworth-Hobbs ME, Hudson MB, Rahnert JA, Zheng B, Franch HA, Price SR.  
328 Docosahexaenoic acid prevents palmitate-induced activation of proteolytic systems in C2C12  
329 myotubes. *J Nutr Biochem.* 2014;25:868-874. <https://doi.org/10.1016/j.jnutbio.2014.03.017>.



- 330 [32] Cacicedo JM, Benjachareowong, S, Chou E, Ruderman NB, Ido Y. Palmitate-induced apoptosis  
331 in cultured bovine retinal pericytes: roles of NAD(P)H oxidase, oxidant stress, and ceramide. *Diabetes*.  
332 2005;54:1838-1845. <https://doi.org/10.2337/diabetes.54.6.1838>.
- 333 [33] Coll T, Jove M, Rodriguez-Calvo R, Eyre E, Palomer X, Sanchez RM, et al. Palmitate-mediated  
334 downregulation of peroxisome proliferator-activated receptor-gamma coactivator 1alpha in skeletal  
335 muscle cells involves MEK1/2 and nuclear factor-kappaB activation. *Diabetes*. 2006;55:2779-2787.  
336 <https://doi.org/10.2337/db05-1494>.
- 337 [34] Chen C, Kassan A, Castañeda D, Gabani M, Choi SK, Kassan M. Metformin prevents vascular  
338 damage in hypertension through the AMPK/ER stress pathway. *Hypertens Res*. 2019;42:960-969.  
339 <https://doi.org/10.1038/s41440-019-0212-z>.
- 340 [35] Varshney R, Varshney R, Mishra R, Roy P. Kaempferol alleviates palmitic acid-induced lipid  
341 stores, endoplasmic reticulum stress and pancreatic  $\beta$ -cell dysfunction through AMPK/mTOR-  
342 mediated lipophagy. *J Nutr Biochem*. 2018:212-227. <https://doi.org/10.1016/j.jnutbio.2018.02.017>.
- 343 [36] Yang M, Zhang D, Zhao Z, Sit J, Saint - Sume M, Shabandri O, et al. Hepatic E4BP4 induction  
344 promotes lipid accumulation by suppressing AMPK signaling in response to chemical or diet - induced  
345 ER stress. *The FASEB Journal*. 2020;34:13533-12547. <https://doi.org/10.1096/fj.201903292RR>.
- 346 [37] Zhang J, Wang Y, Bao C, Liu T, Huang J, Li J. Curcuminloaded PEGPDLLA nanoparticles for  
347 attenuating palmitateinduced oxidative stress and cardiomyocyte apoptosis through AMPK pathway.  
348 *International Journal of Molecular Medicine*. 2019;44:672-682.  
349 <https://doi.org/10.3892/ijmm.2019.4228>.
- 350 [38] Salvadó L, Barroso E, Gómez-Foix AM, Palomer X, Michalik L, Wahli W, Vázquez-Carrera M.  
351 PPAR $\beta/\delta$  prevents endoplasmic reticulum stress-associated inflammation and insulin resistance in  
352 skeletal muscle cells through an AMPK-dependent mechanism. *Diabetologia*. 2014;57:2126-2135.  
353 <https://doi.org/10.1007/s00125-013-2867-3>.
- 354 [39] Kwak HJ, Choi HE, Cheon HG. 5-LO inhibition ameliorates palmitic acid-induced ER stress,  
355 oxidative stress and insulin resistance via AMPK activation in murine myotubes. *Scientific Reports*.  
356 2017;7:5025. <https://doi.org/10.1038/s41598-017-05346-5>.
- 357 [40] Yang L, Sha H, Davisson RL, Qi L. Phenformin activates the unfolded protein response in an  
358 AMP-activated protein kinase (AMPK)-dependent manner. *Journal of Biological Chemistry*.  
359 2013;288:13631-13638. <https://doi.org/10.1074/jbc.M113.462762>.

360

## 361 **10 Data Availability Statement**

362 The datasets generated in this study can be obtained from the corresponding author on reasonable  
363 request.

## 364 Figure legends

365 **Figure 1.** AMPK signaling is activated within 12 h of palmitate treatment. (A) C1C12 myotubes were  
366 incubated with 0.5 mM palmitate (Pal) for 0, 3, 6, 12, and 24 h. Proteins levels of AMPK $\alpha$  and p-  
367 AMPK $\alpha$  were evaluated by western blotting. The intensity of the protein bands was quantified by  
368 densitometry with Image-Pro Plus 6.0 software (n=4). (B) RT-PCR analysis of *ATF4*, *CHOP*, and  
369 *XBPIs* mRNA levels in C2C12 myotubes treated as described in panel A (n=4). Data are shown as the  
370 mean $\pm$ SD. \* $P$ <0.05, \*\* $P$ <0.01, \*\*\* $P$ <0.001 vs control (0h) group (1-way analysis of variance).

371 **Figure 2.** AMPK inhibition attenuates palmitate-induced UPR in C2C12 myotubes. (A) C2C12  
372 myotubes were incubated for 12 h with 0.5 mM palmitate (Pal) in the presence or absence of 10  $\mu$ M  
373 AMPK inhibitor compound C (C c). *BIP*, *ATF4*, *CHOP*, *GADD34*, *XBPIu*, and *XBPIs* mRNA levels  
374 were determined by RT-PCR (n=6). (B) Western blot analysis of AMPK $\alpha$ , p-AMPK $\alpha$ , CHOP, and  
375 ATF4 proteins levels in C2C12 myotubes treated as described in panel A. The intensity of the protein  
376 bands was quantified by densitometry with Image-Pro Plus 6.0 software (n=6). Data are shown as  
377 mean $\pm$ SD. \* $P$ <0.05, \*\* $P$ <0.01, \*\*\* $P$ <0.001 vs control (Con) group; # $P$ <0.05, ## $P$ <0.01, ### $P$ <0.001 vs  
378 Pal group (1-way analysis of variance).

379 **Figure 3.** TUDCA alleviates palmitate-induced AMPK activation in C2C12 myotubes. C2C12  
380 myotubes were pretreated for 1 h with 1 mM TUDCA or left untreated before palmitate (Pal) was  
381 added for another 12 h. Protein levels of AMPK $\alpha$ , p-AMPK $\alpha$ , ATF4, and CHOP were evaluated by  
382 western blotting (n=4). The intensity of the protein bands was quantified by densitometry with Image-  
383 Pro Plus 6.0 software (n=4). Data are shown as mean $\pm$ SD. \*\*\* $P$ <0.001 vs control (Con) group;  
384 ### $P$ <0.001 vs Pal group (1-way analysis of variance).

385 **Figure 4.** AMPK activation is sufficient to induce the UPR. (A) C2C12 myotubes were treated with  
386 different concentrations of AICAR (0.125–2 mM) for 12 h. Proteins levels of AMPK $\alpha$ , p-AMPK $\alpha$ , and  
387 ATF4 were determined by western blotting. The intensity of the protein bands was quantified by  
388 densitometry with Image-Pro Plus 6.0 software (n=4). (B) RT-PCR analysis of *BIP*, *ATF4*, *CHOP*,  
389 *GADD34*, *XBPIu*, and *XBPIs* mRNA levels in C2C12 myotubes treated as described in panel A (n=3).  
390 (C) C2C12 myotubes were treated with 1 mM AICAR for different times (0–12 h). Protein levels of  
391 AMPK $\alpha$  and p-AMPK $\alpha$  were determined by western blotting. The intensity of the protein bands was  
392 quantified by densitometry with Image-Pro Plus 6.0 software (n=4). (D) RT-PCR analysis of *BIP*,  
393 *ATF4*, *CHOP*, *GADD34*, *XBPIu*, and *XBPIs* mRNA levels in C2C12 myotubes treated as described  
394 in panel C (n=3). Data are shown as mean $\pm$ SD. \* $P$ <0.05, \*\* $P$ <0.01, \*\*\* $P$ <0.001 vs control (0 $\mu$ M or  
395 0h) group (1-way analysis of variance).

396

397

398



**A**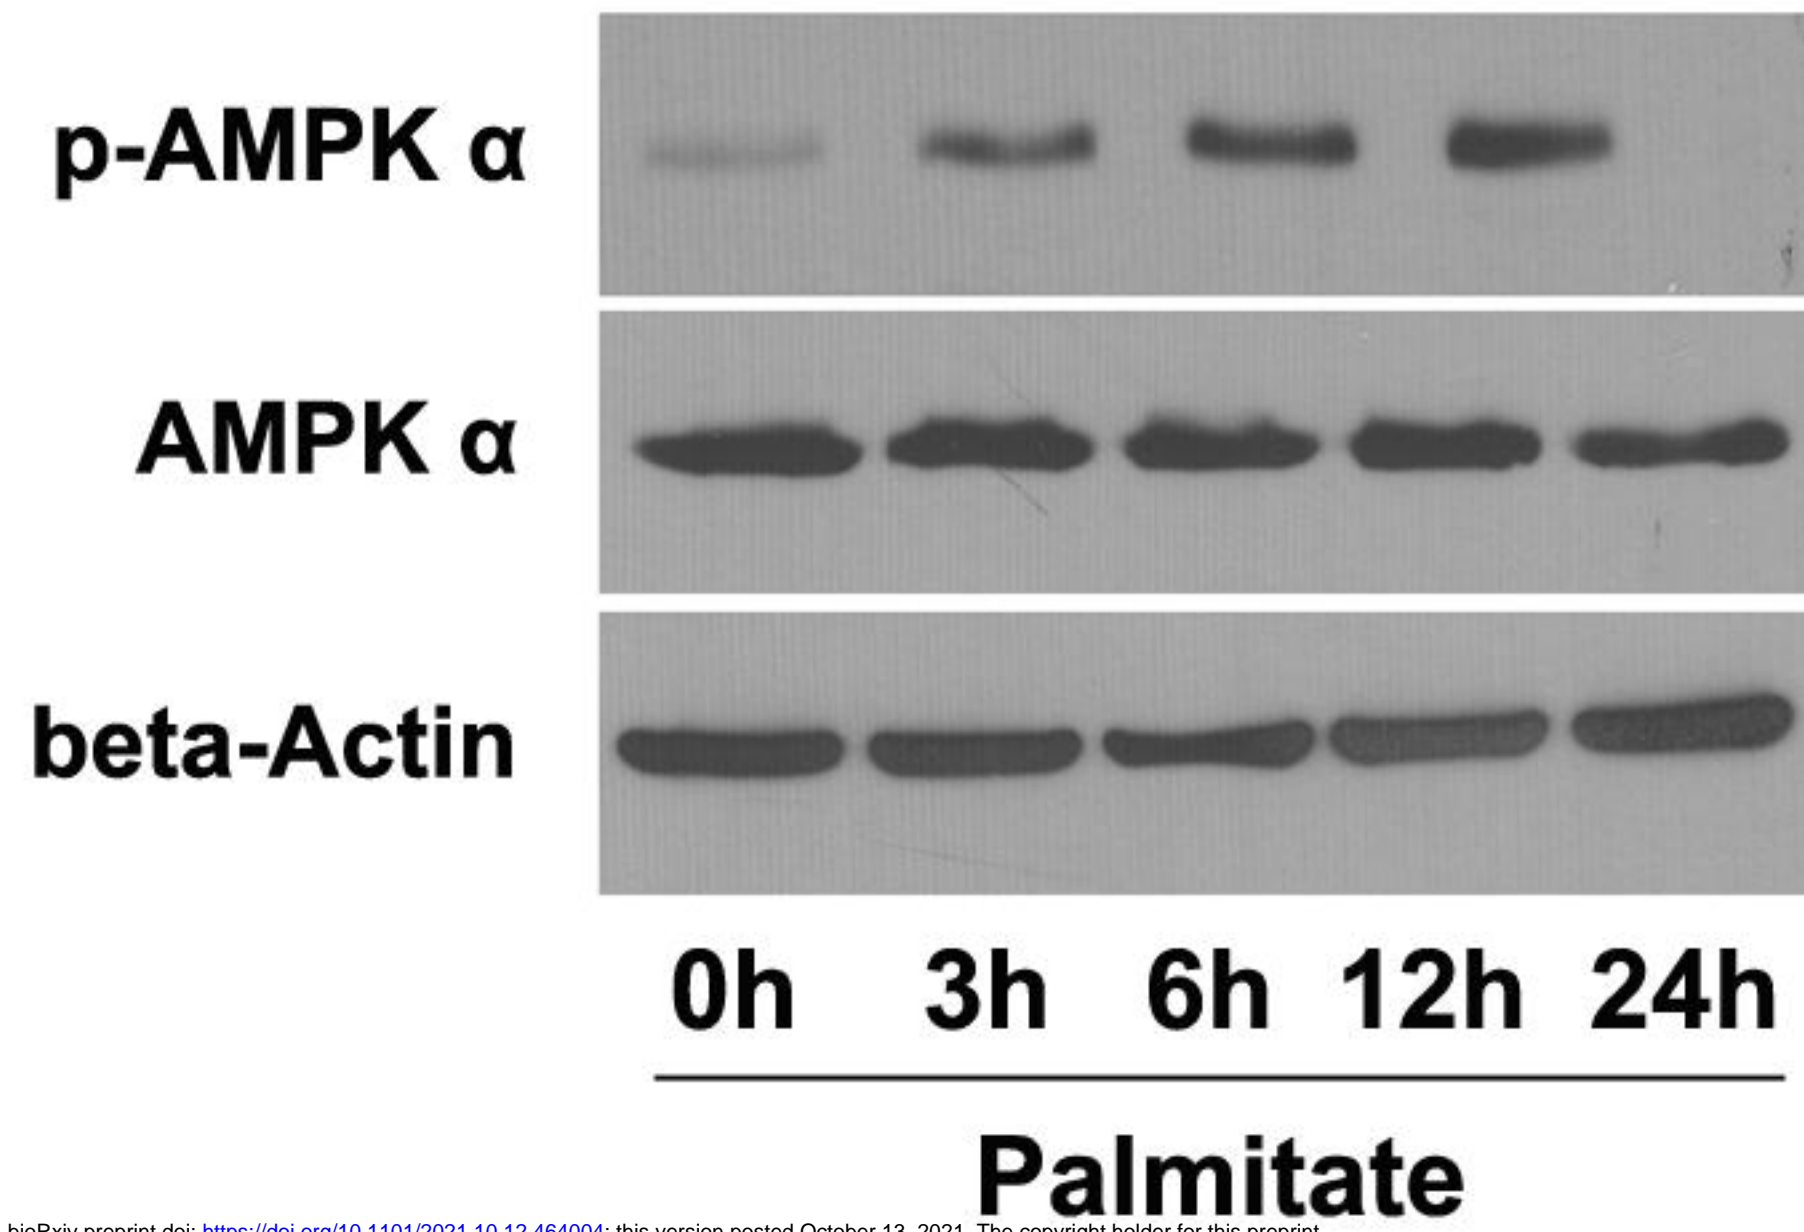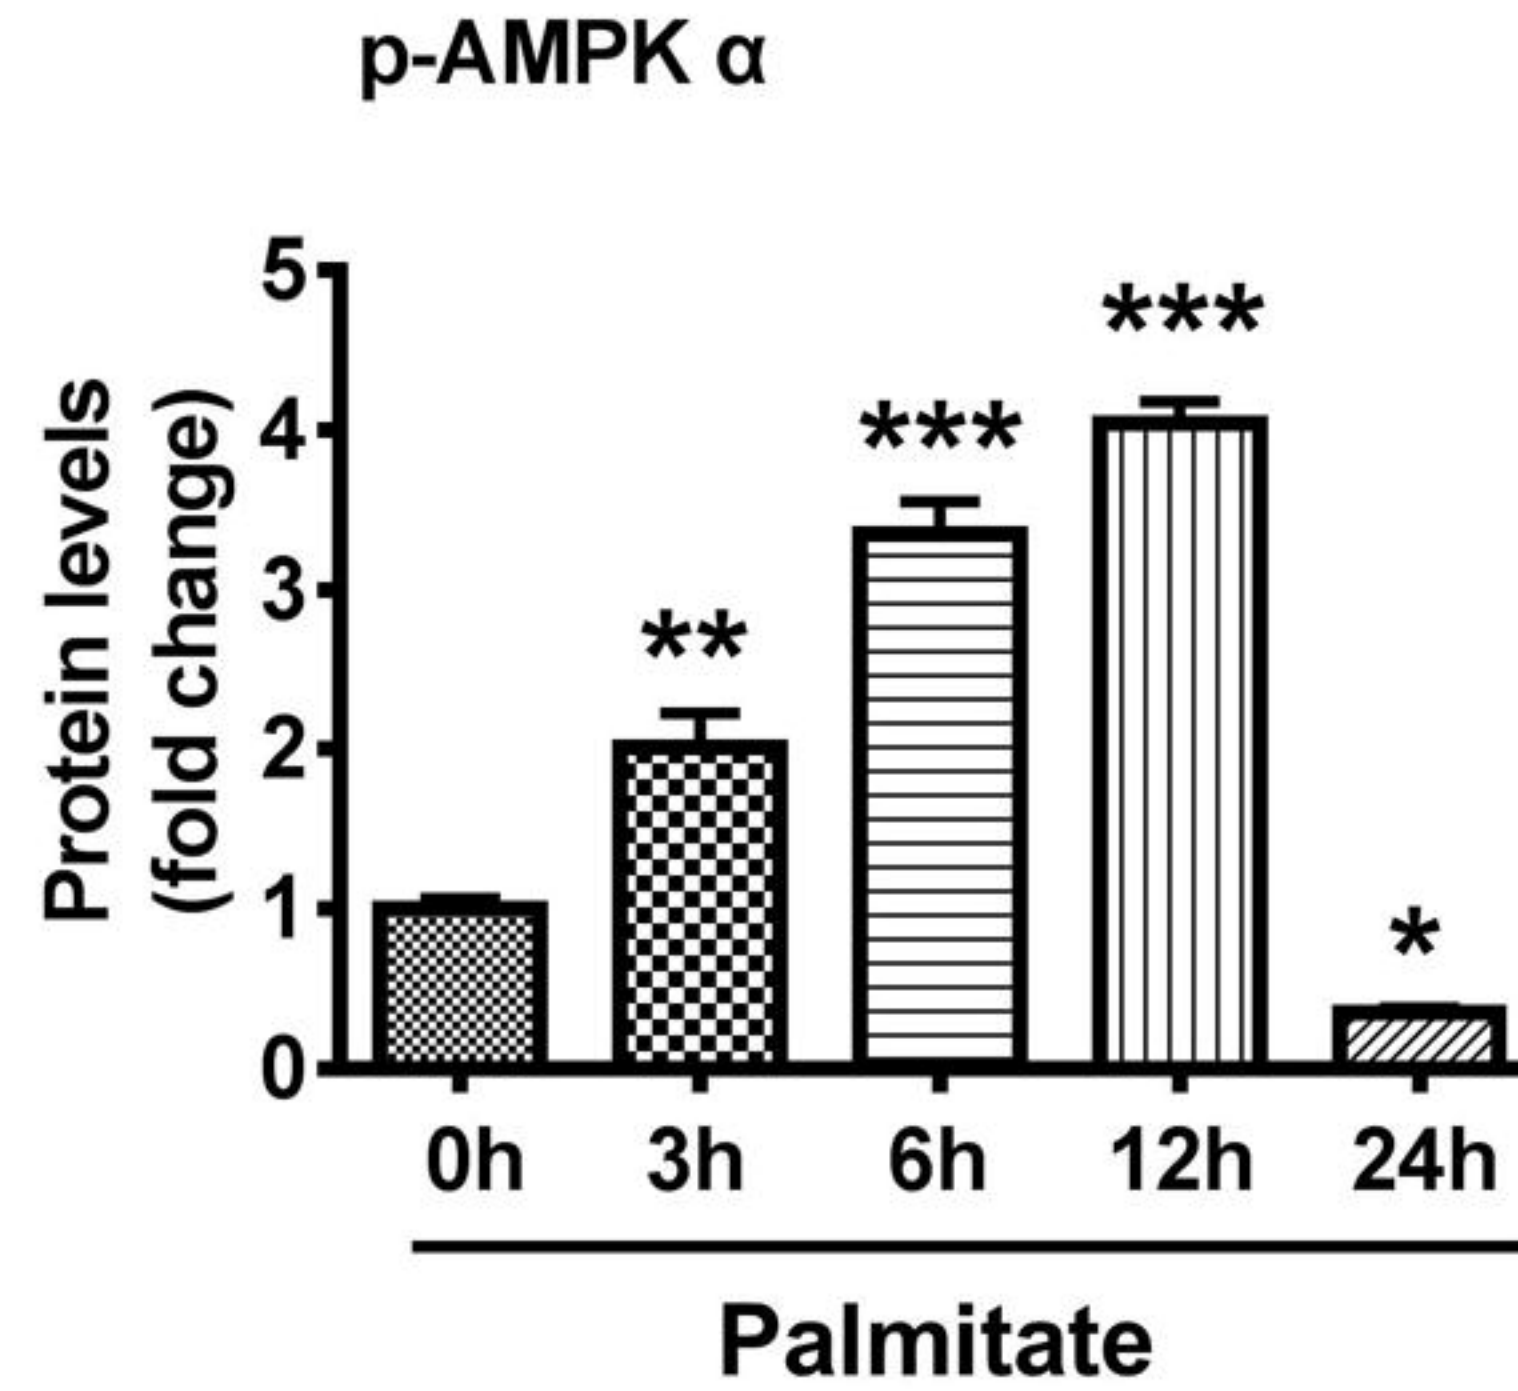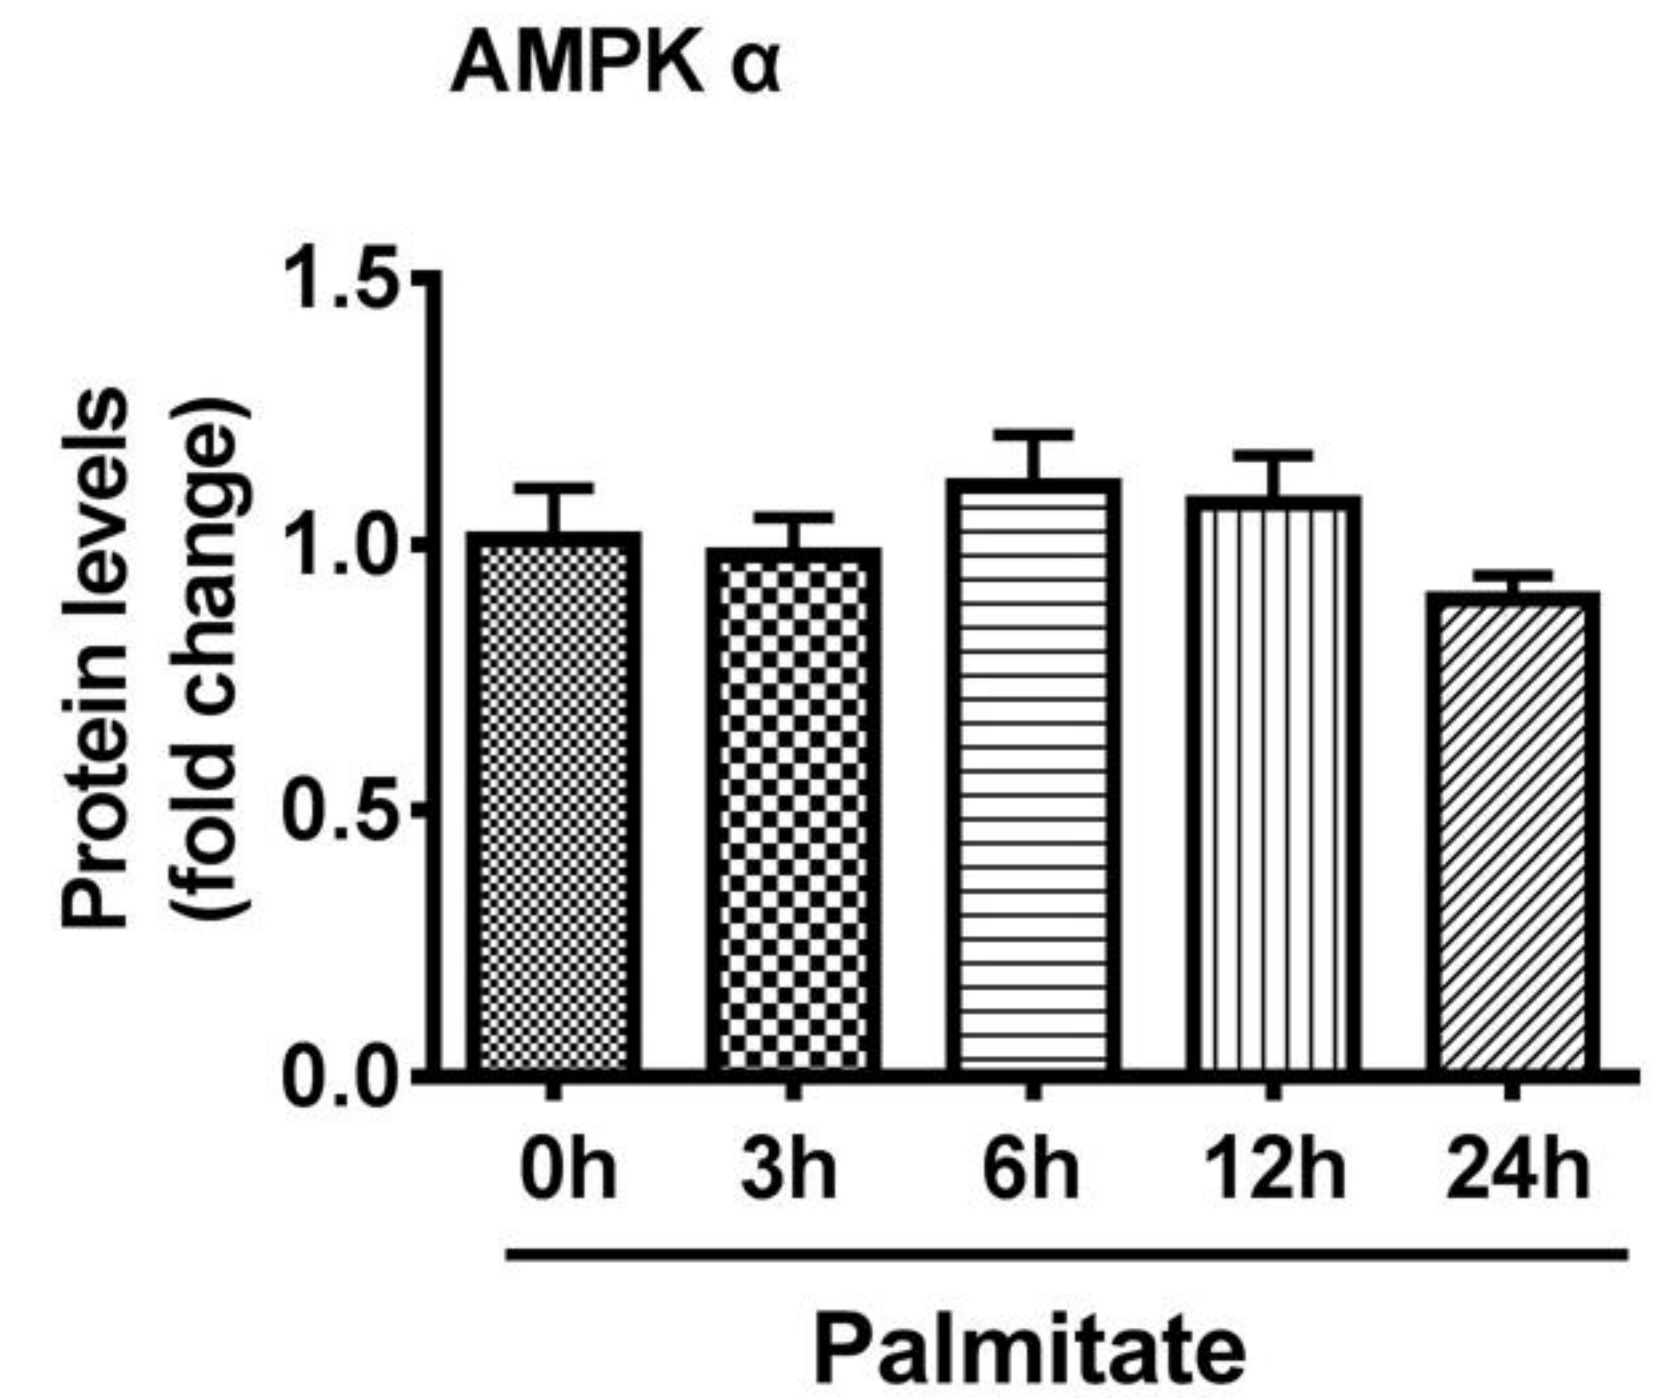

bioRxiv preprint doi: <https://doi.org/10.1101/2021.10.12.464004>; this version posted October 13, 2021. The copyright holder for this preprint (which was not certified by peer review) is the author/funder, who has granted bioRxiv a license to display the preprint in perpetuity. It is made available under aCC-BY-NC-ND 4.0 International license.

**B**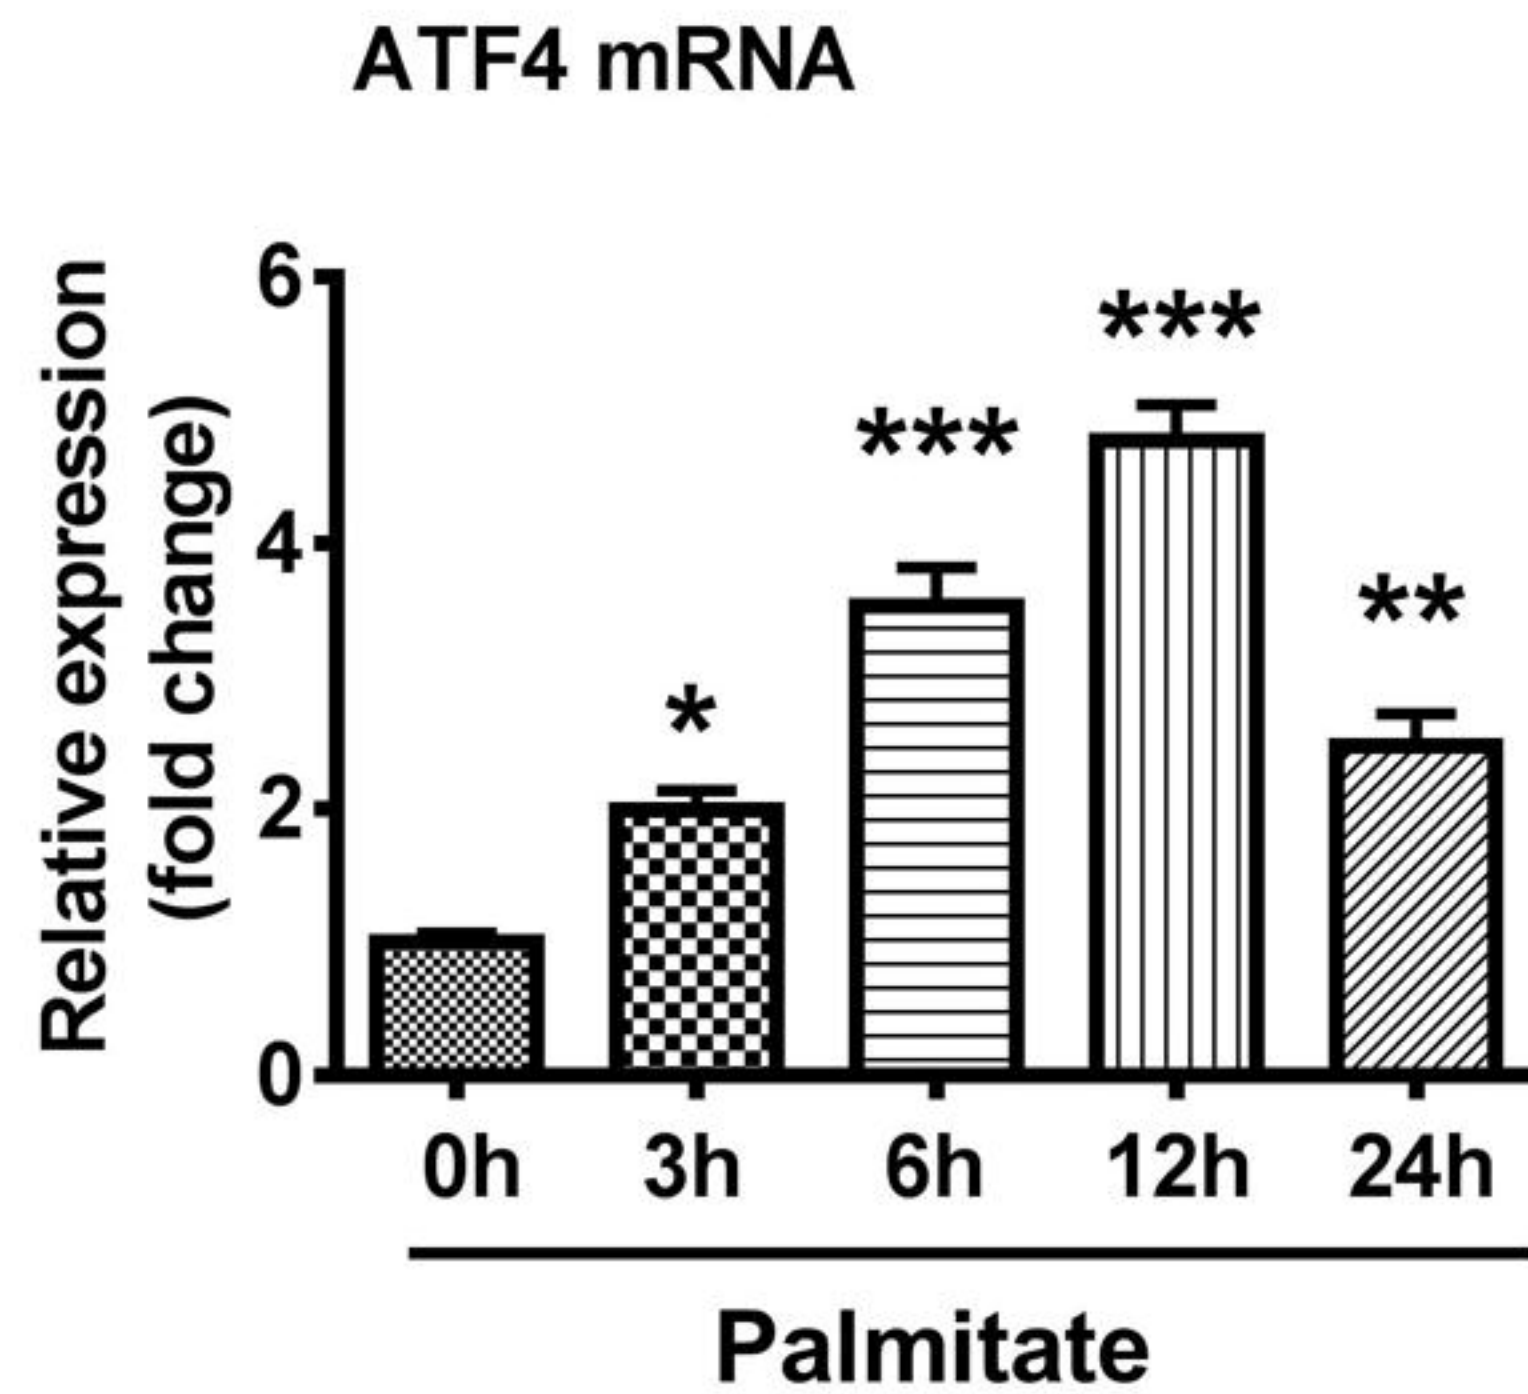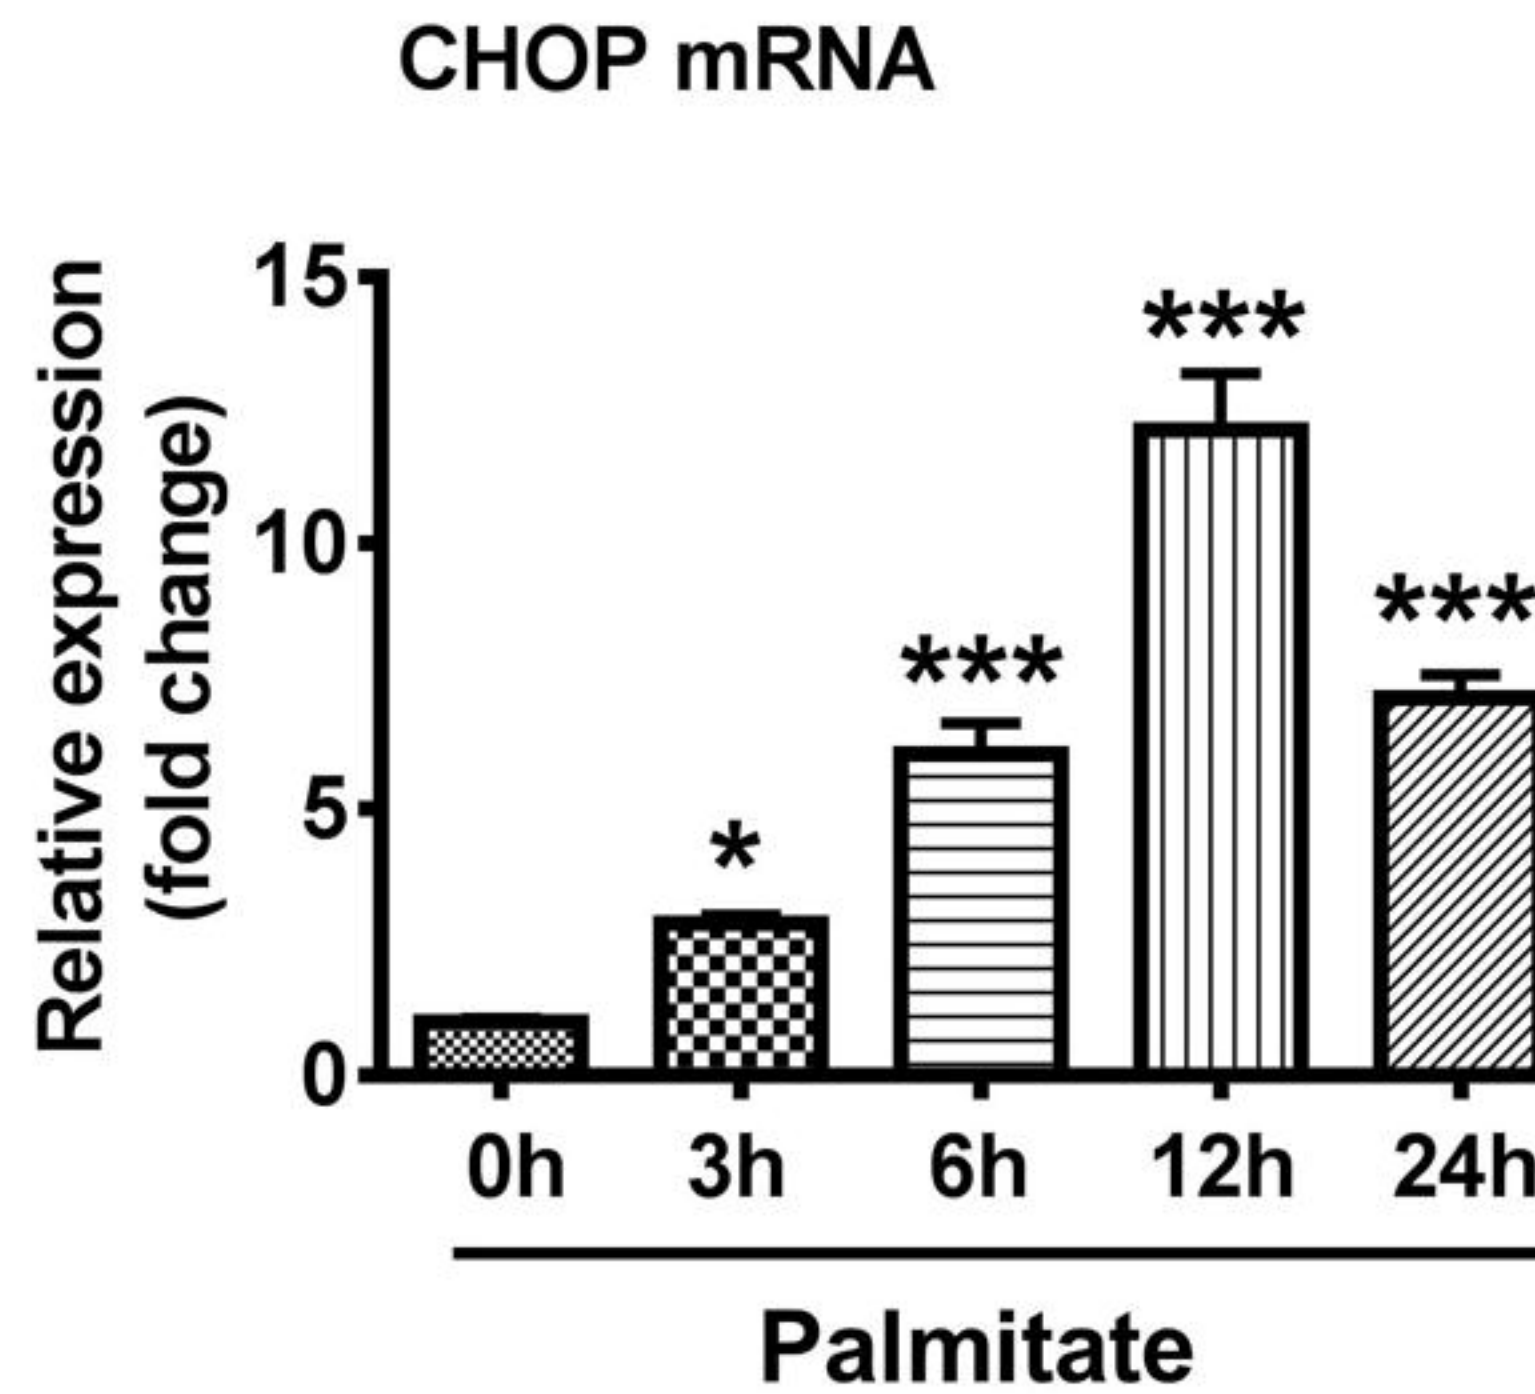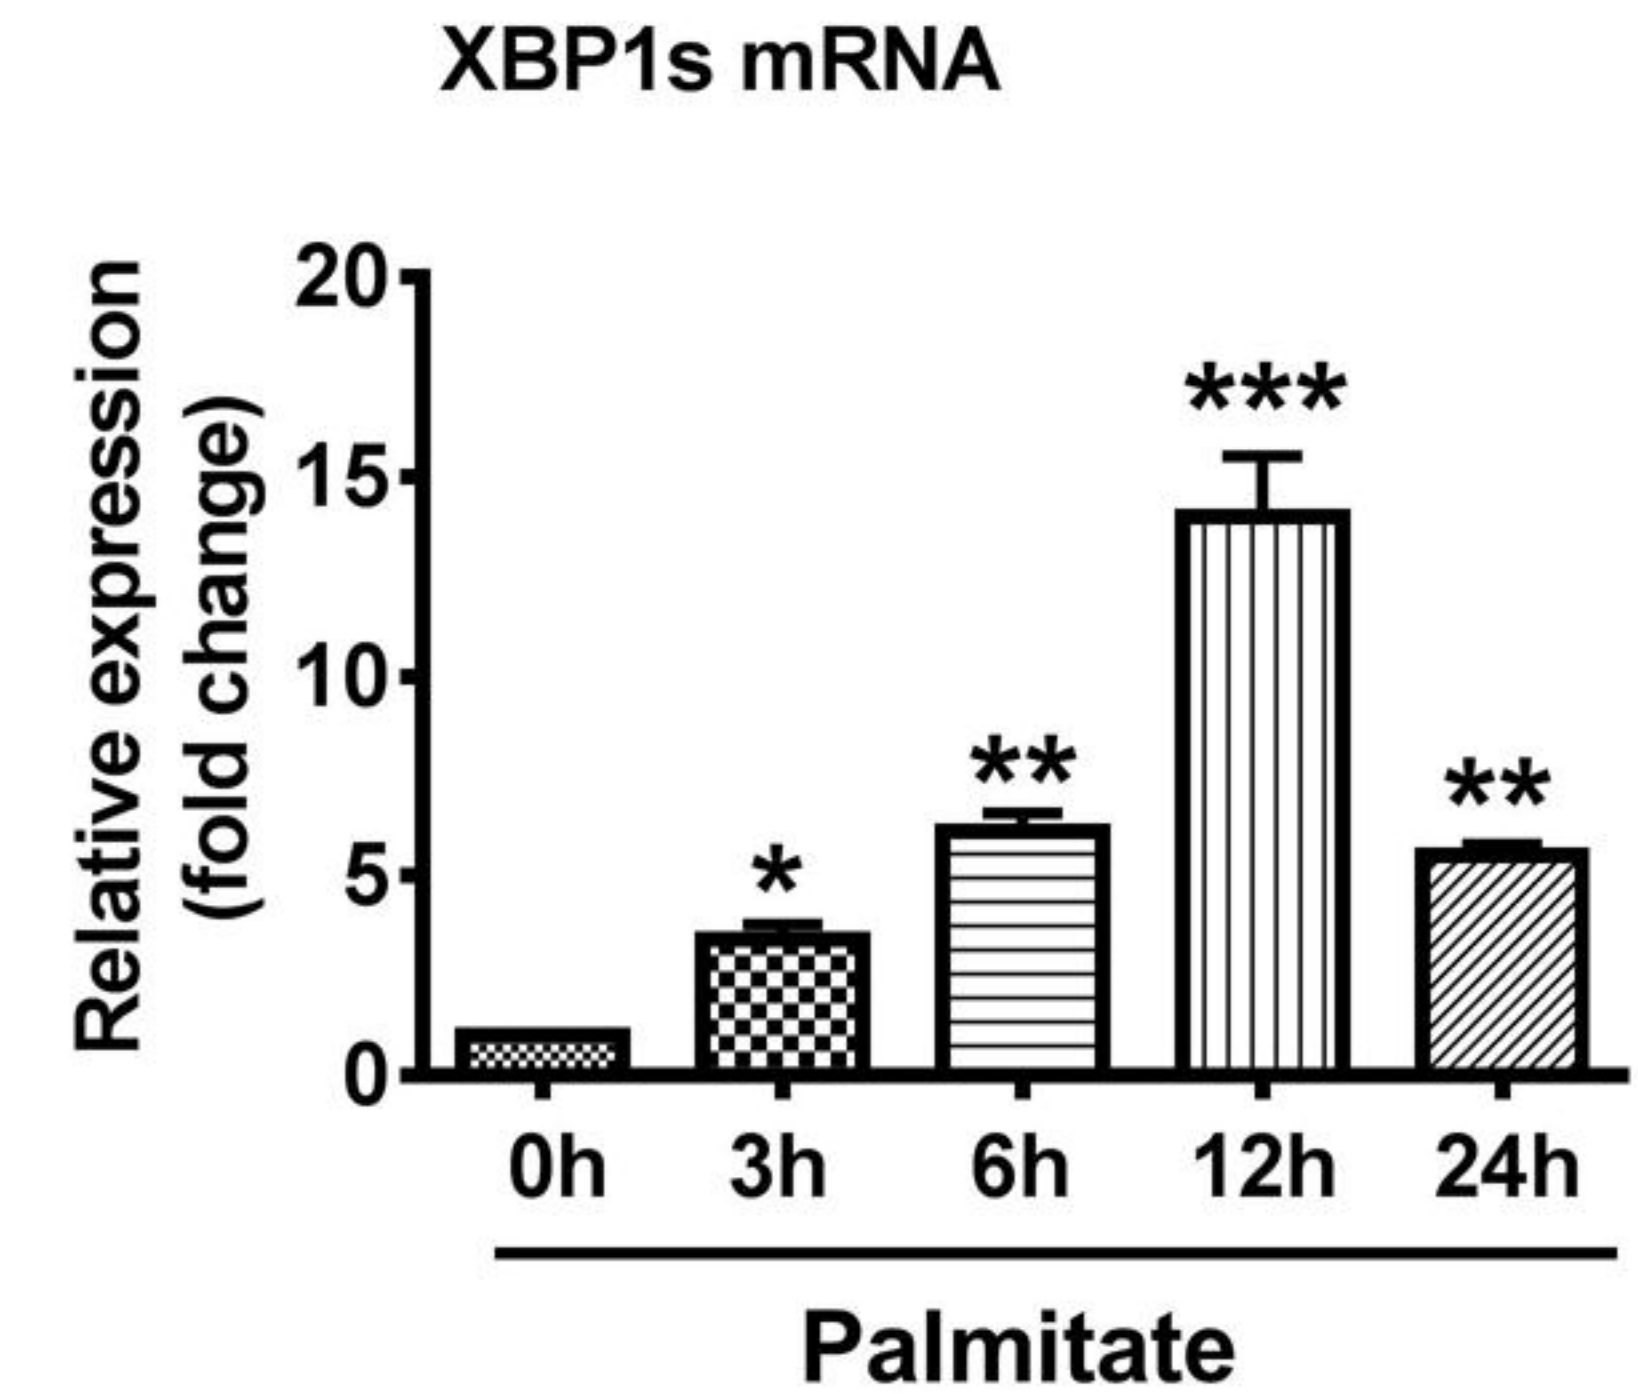



**A**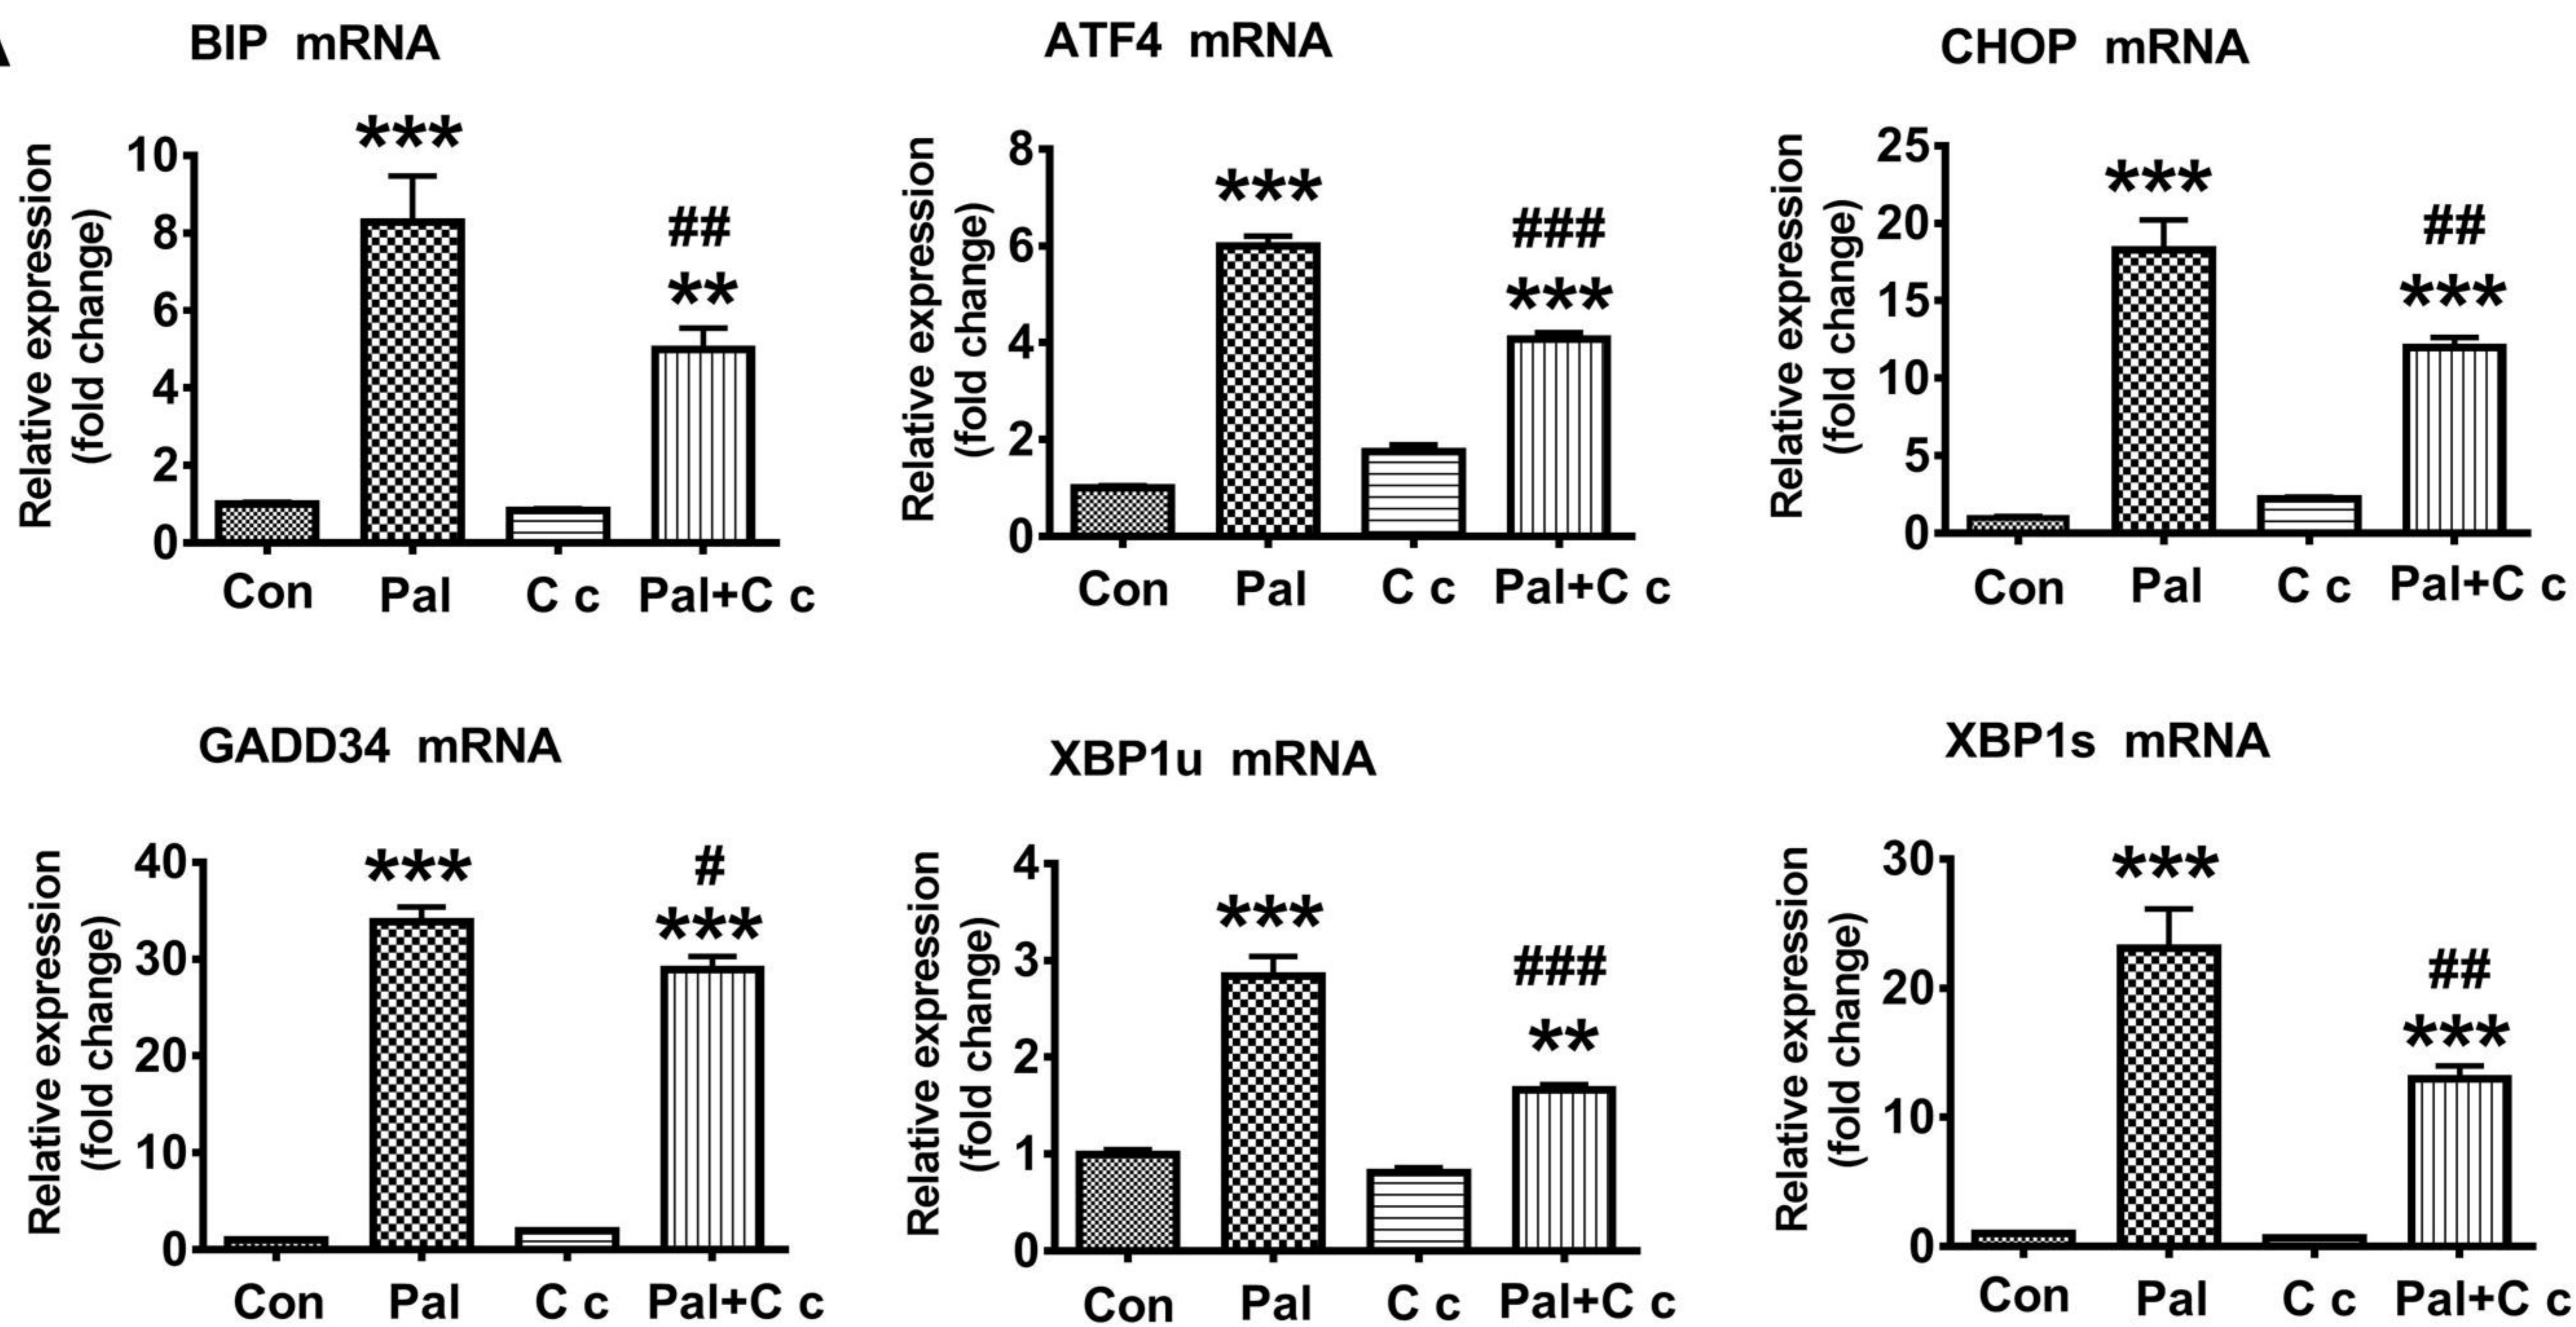**B**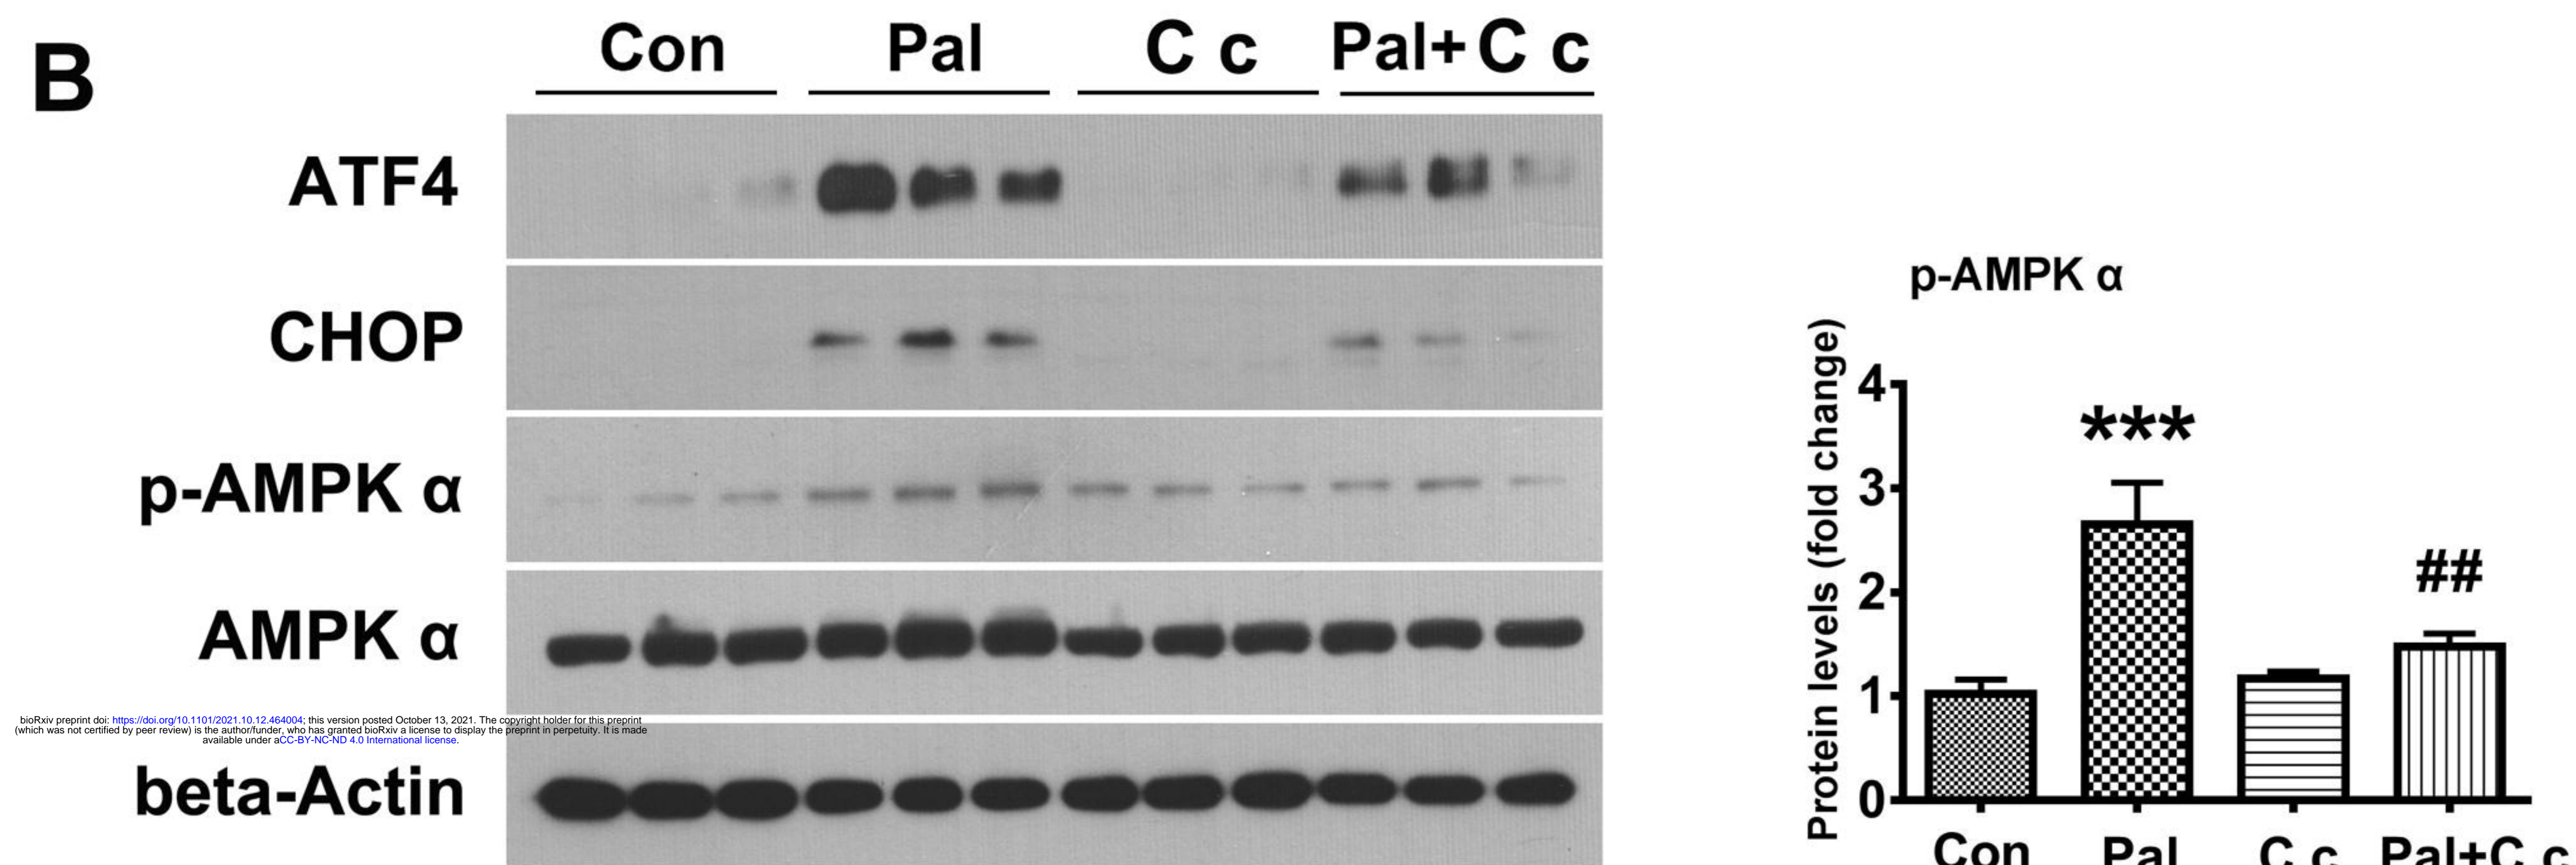

bioRxiv preprint doi: <https://doi.org/10.1101/2021.10.12.464004>; this version posted October 13, 2021. The copyright holder for this preprint (which was not certified by peer review) is the author/funder, who has granted bioRxiv a license to display the preprint in perpetuity. It is made available under aCC-BY-NC-ND 4.0 International license.

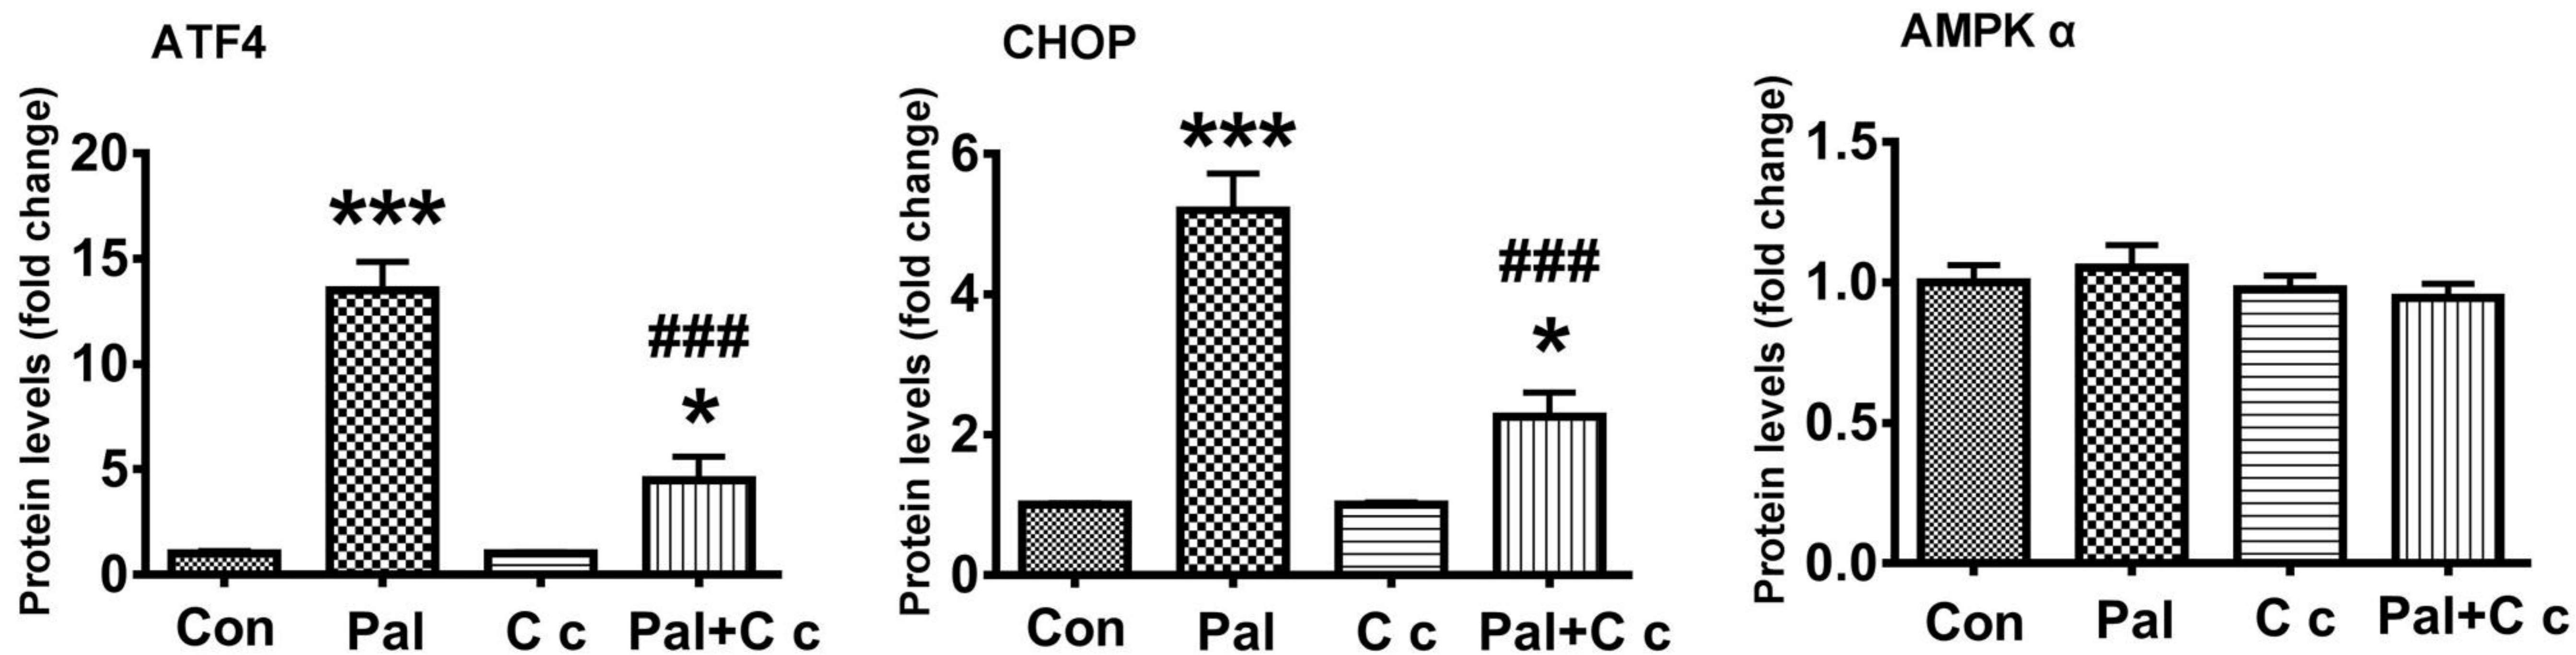



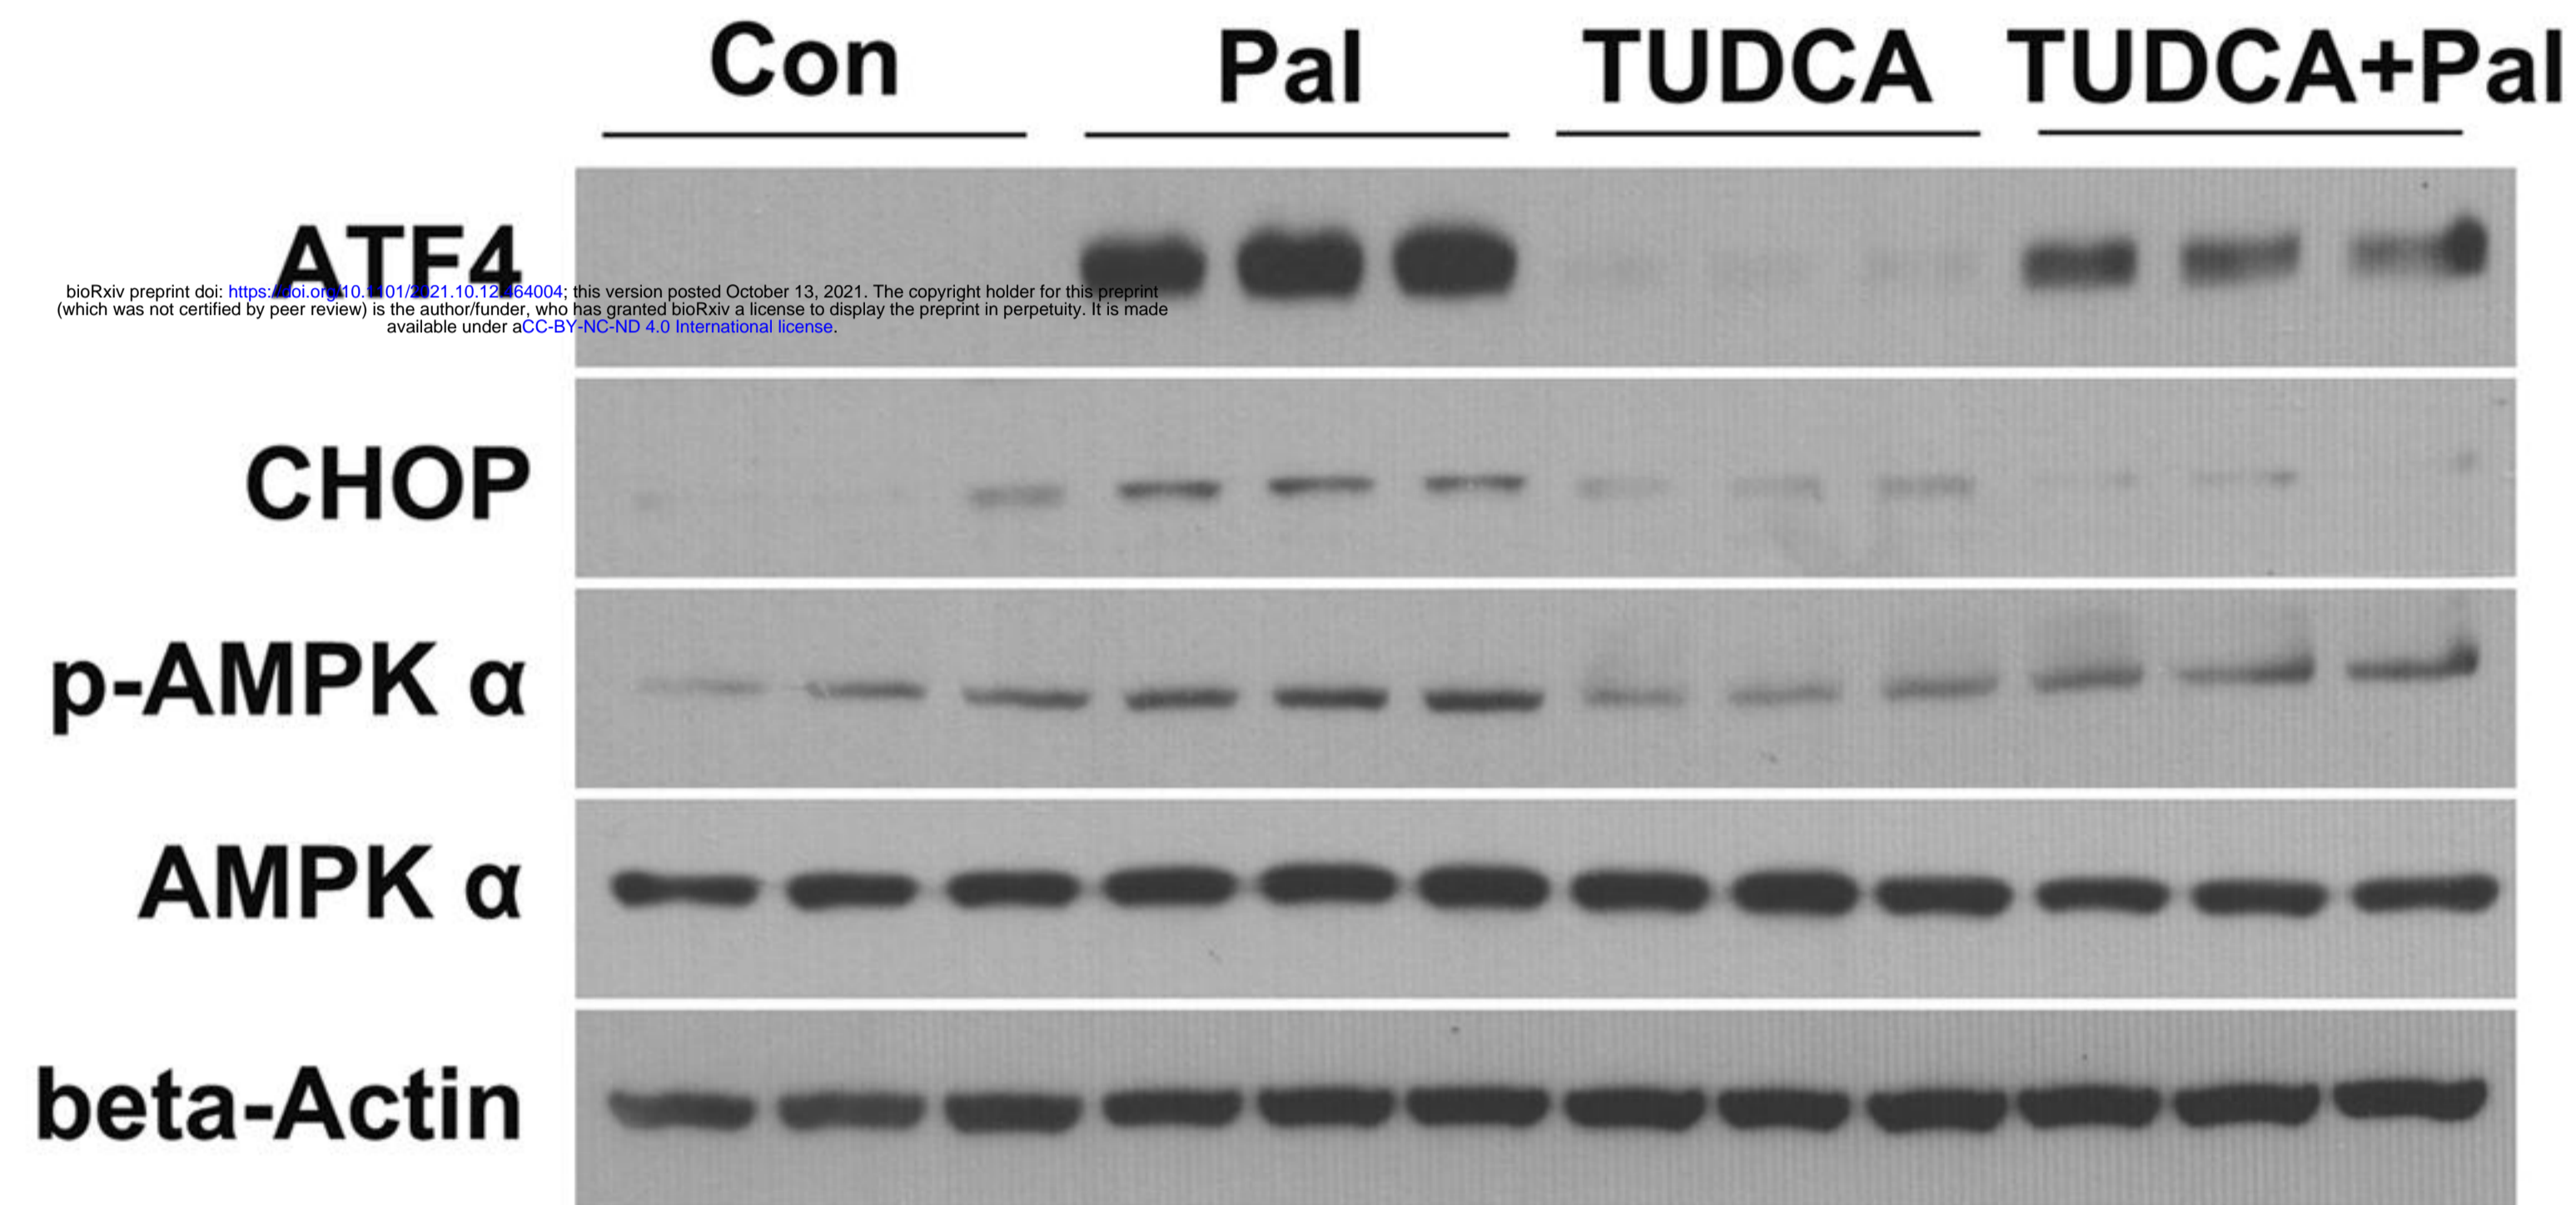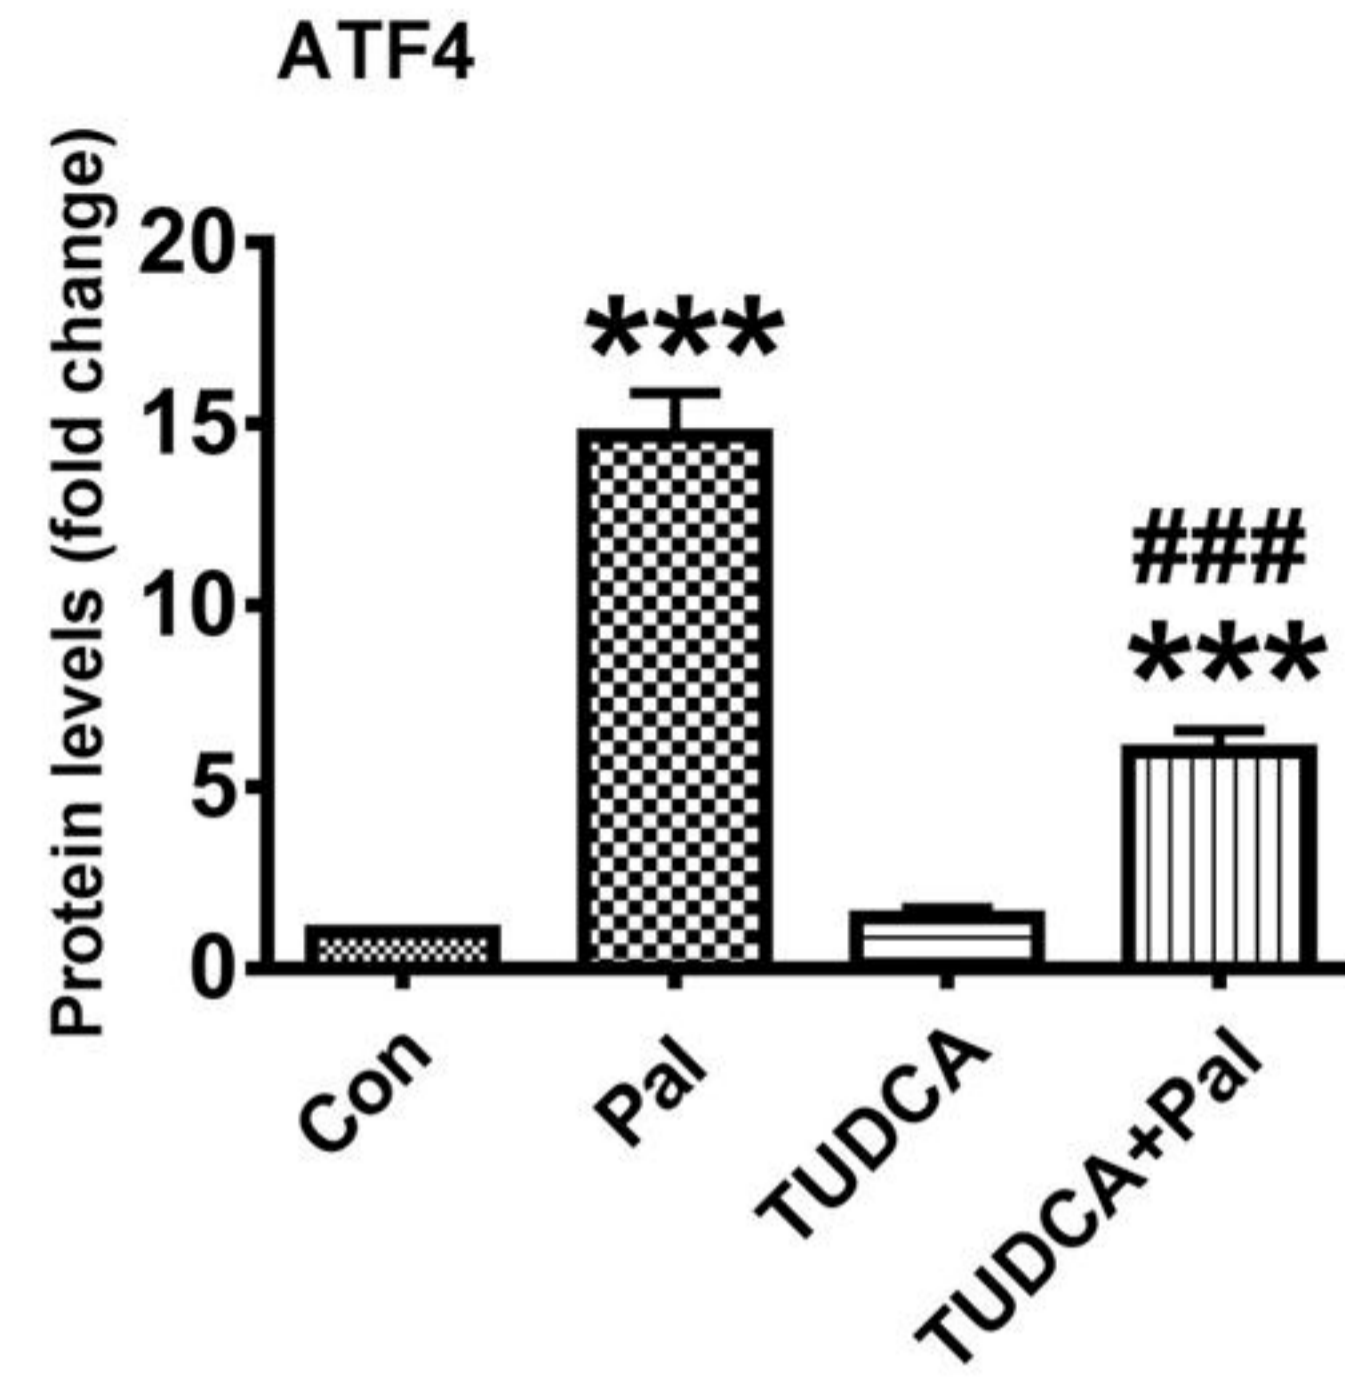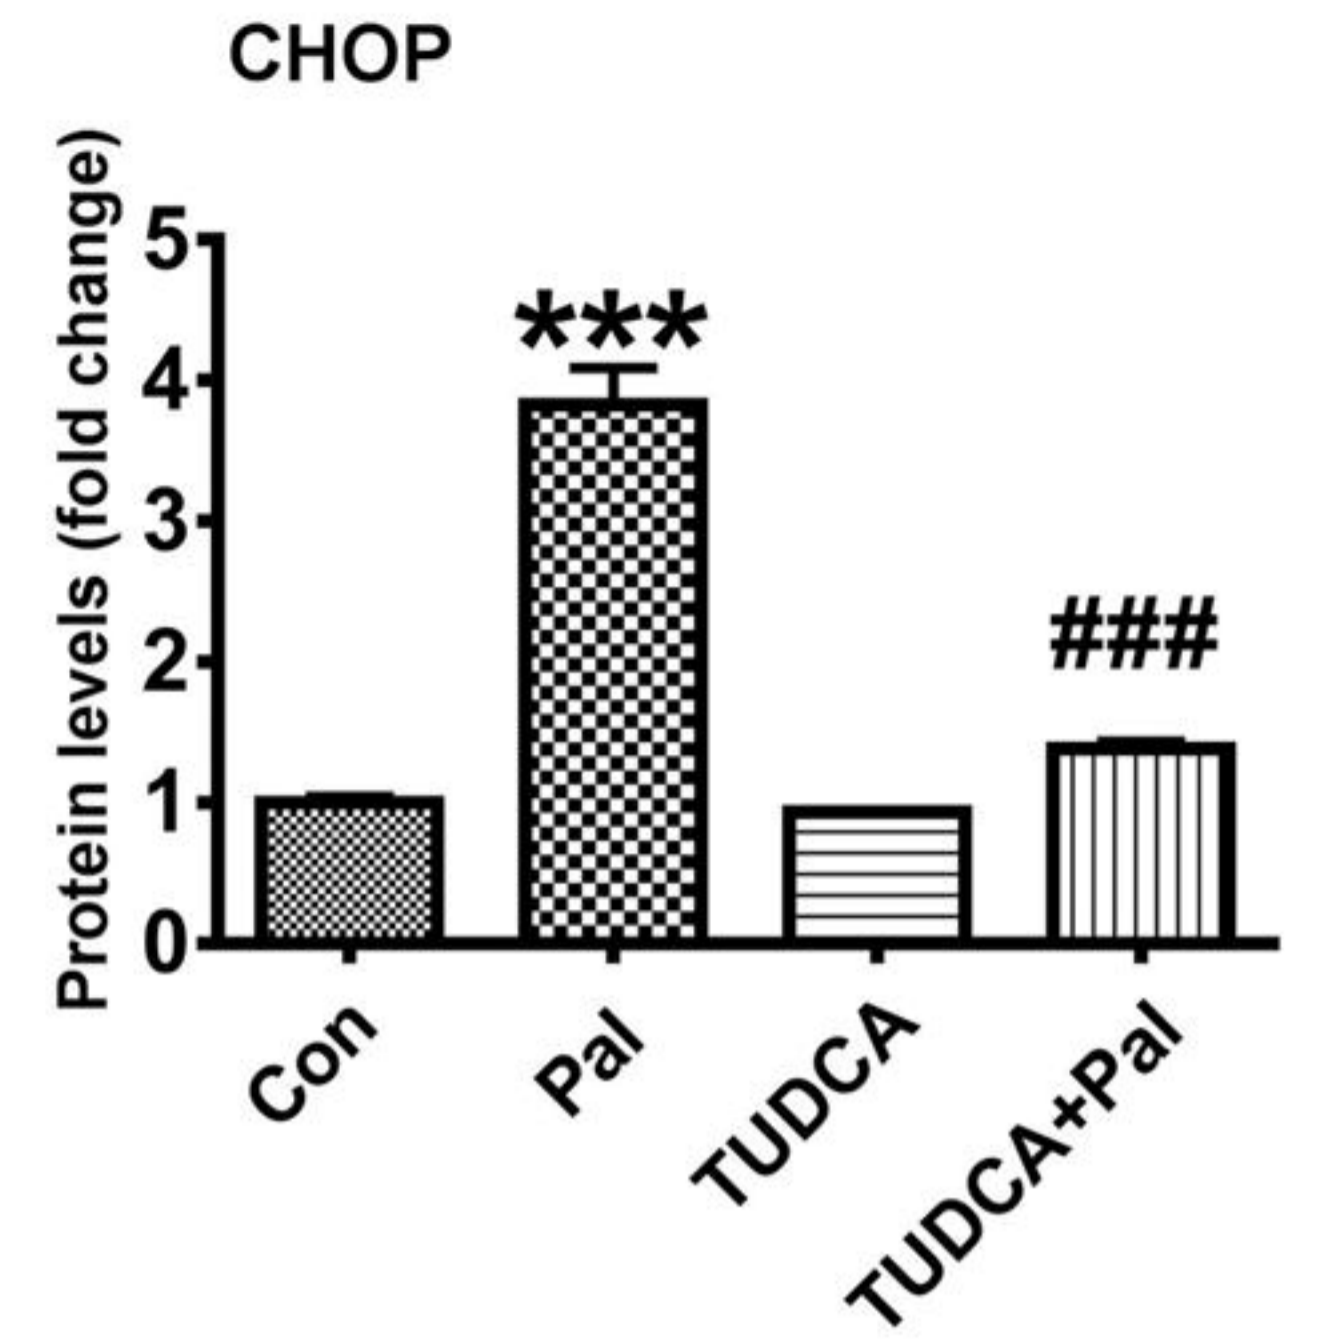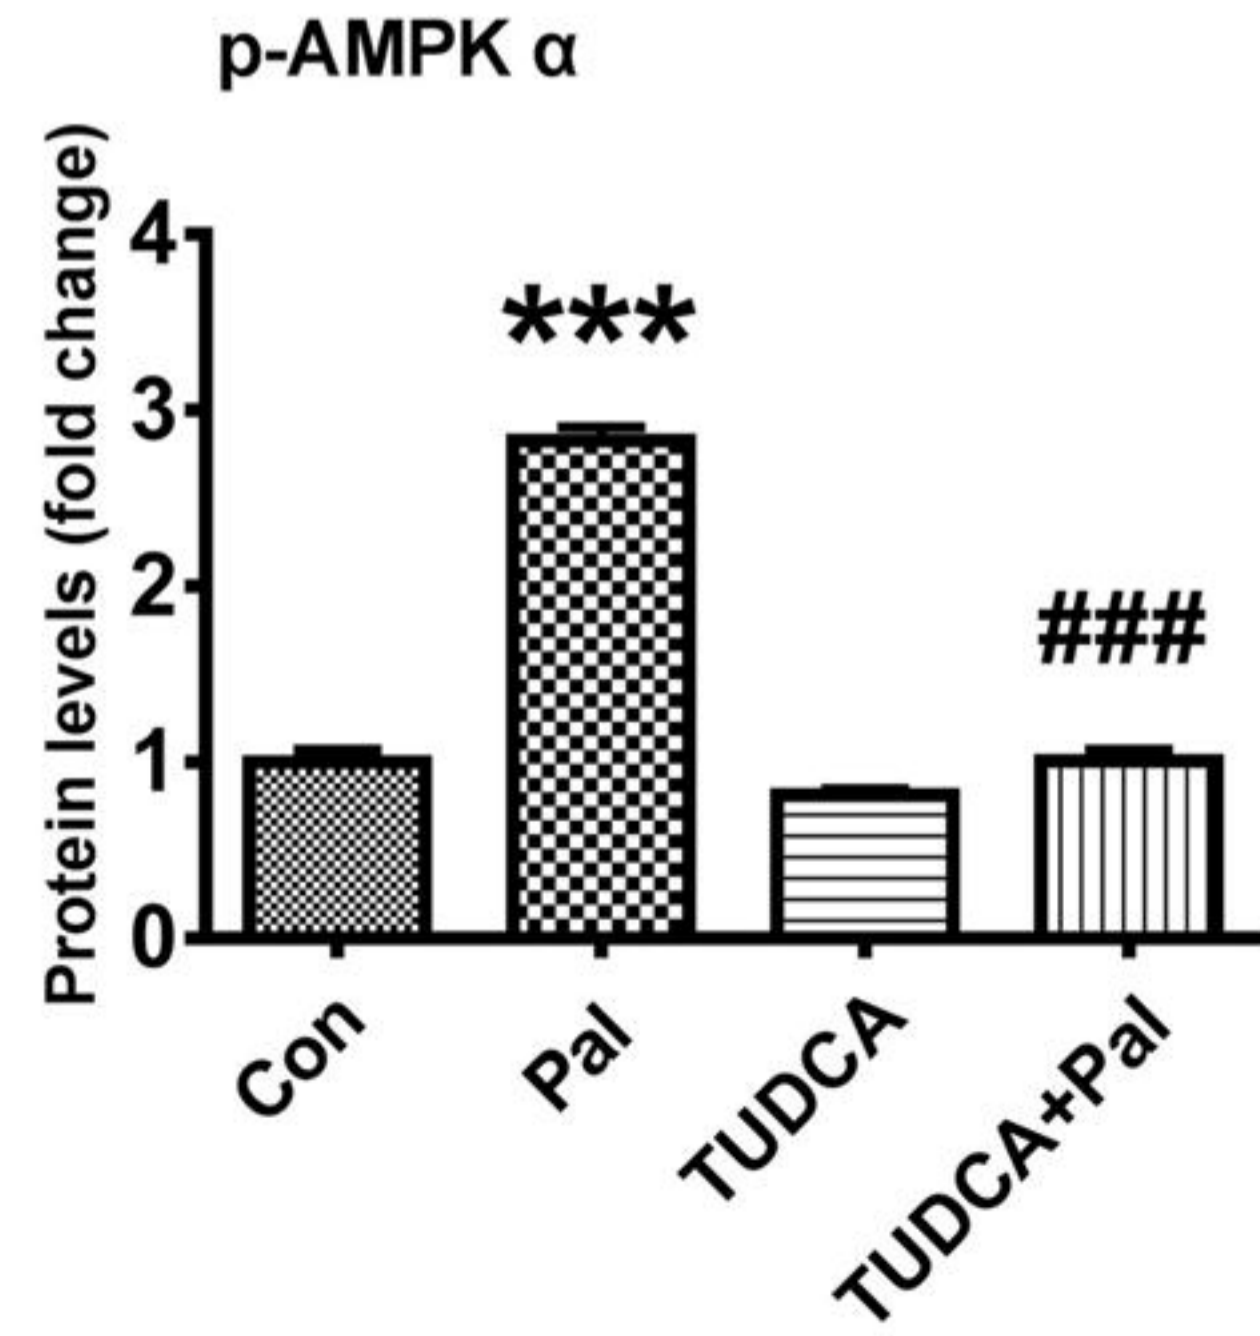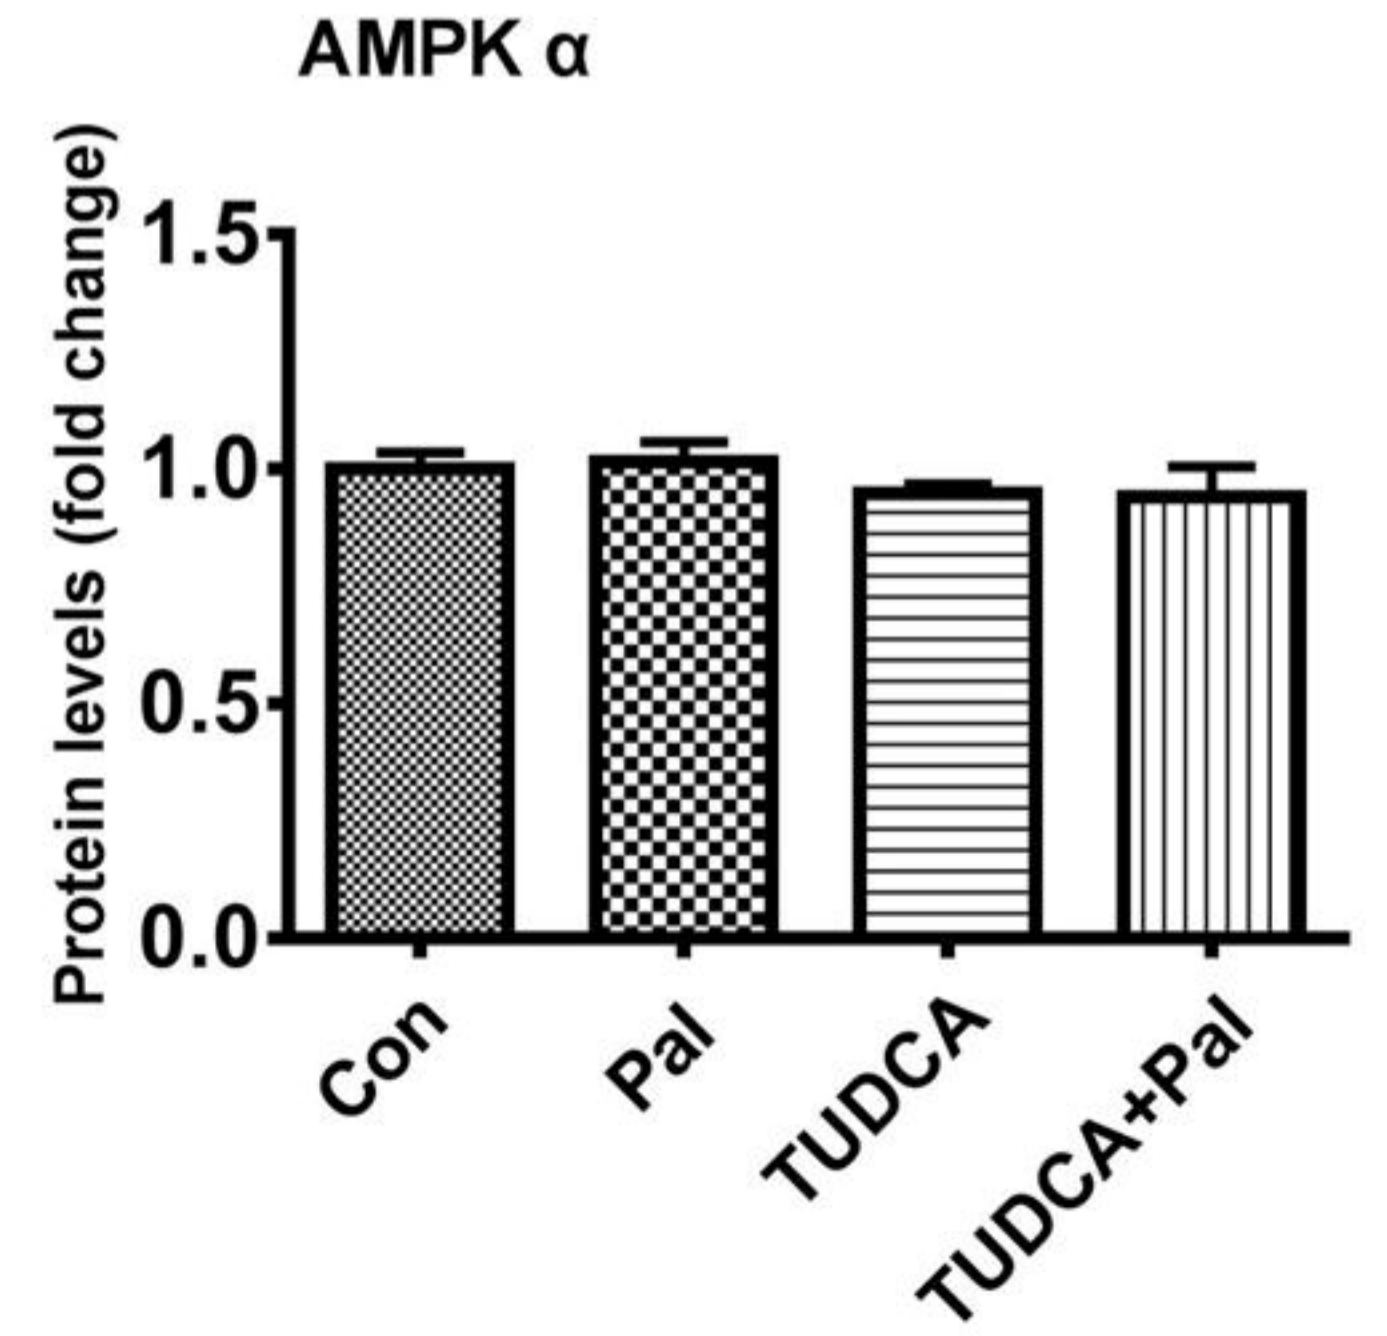



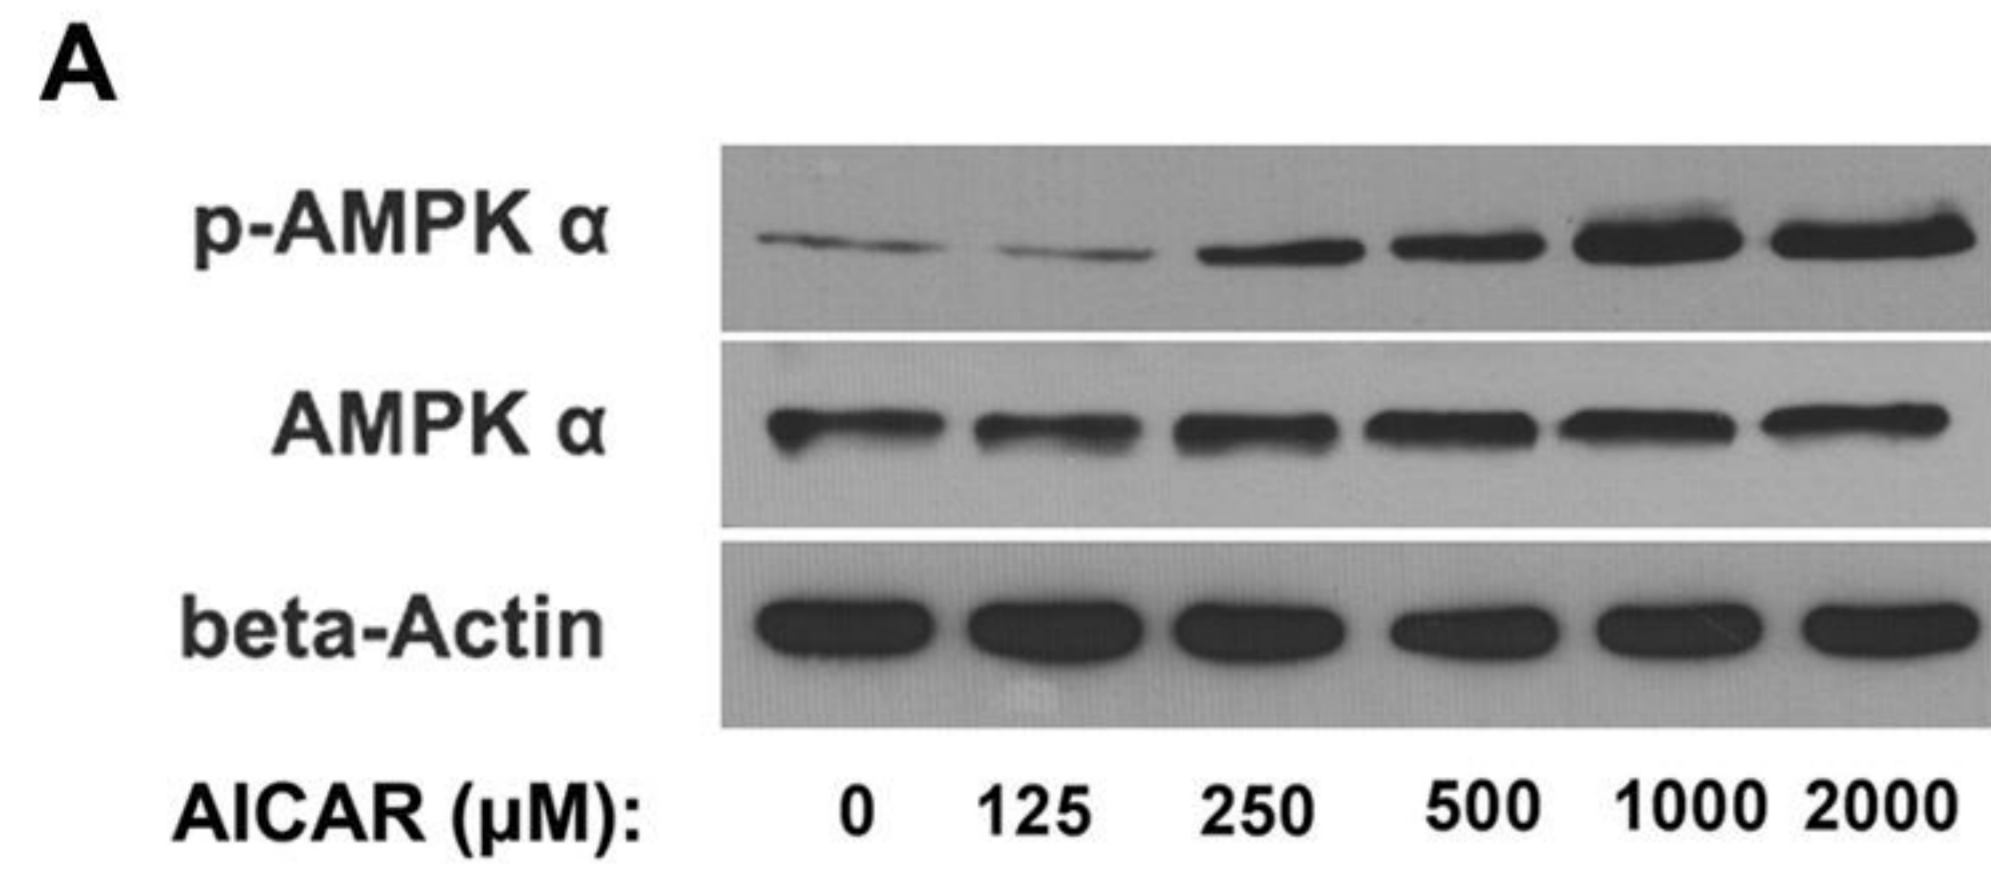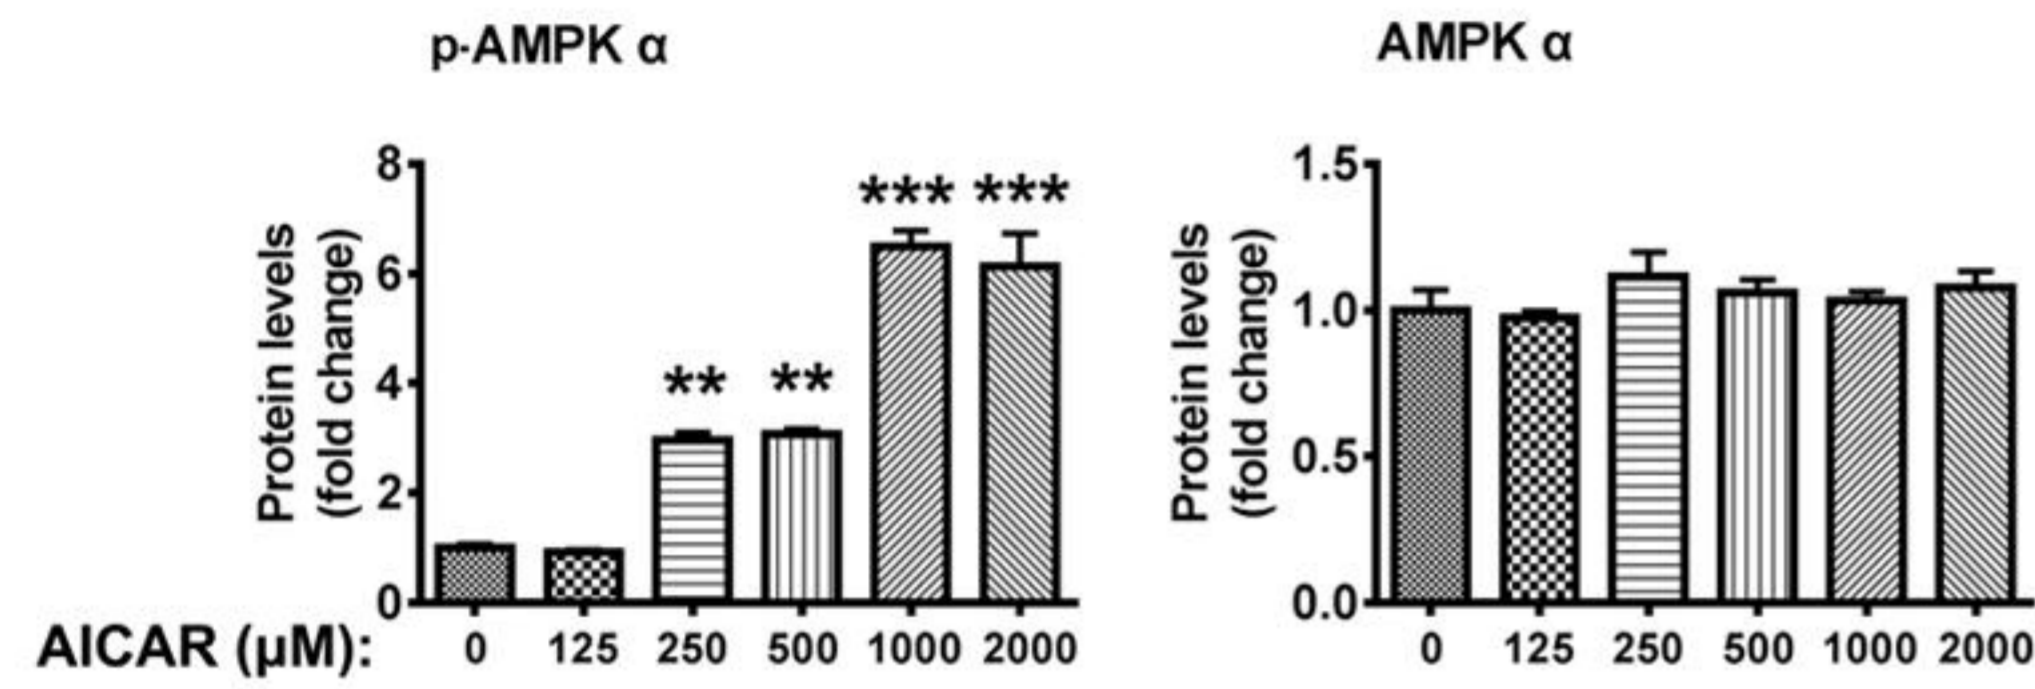

bioRxiv preprint doi: <https://doi.org/10.1101/2021.10.12.464004>; this version posted October 13, 2021. The copyright holder for this preprint (which was not certified by peer review) is the author/funder, who has granted bioRxiv a license to display the preprint in perpetuity. It is made available under aCC-BY-NC-ND 4.0 International license.

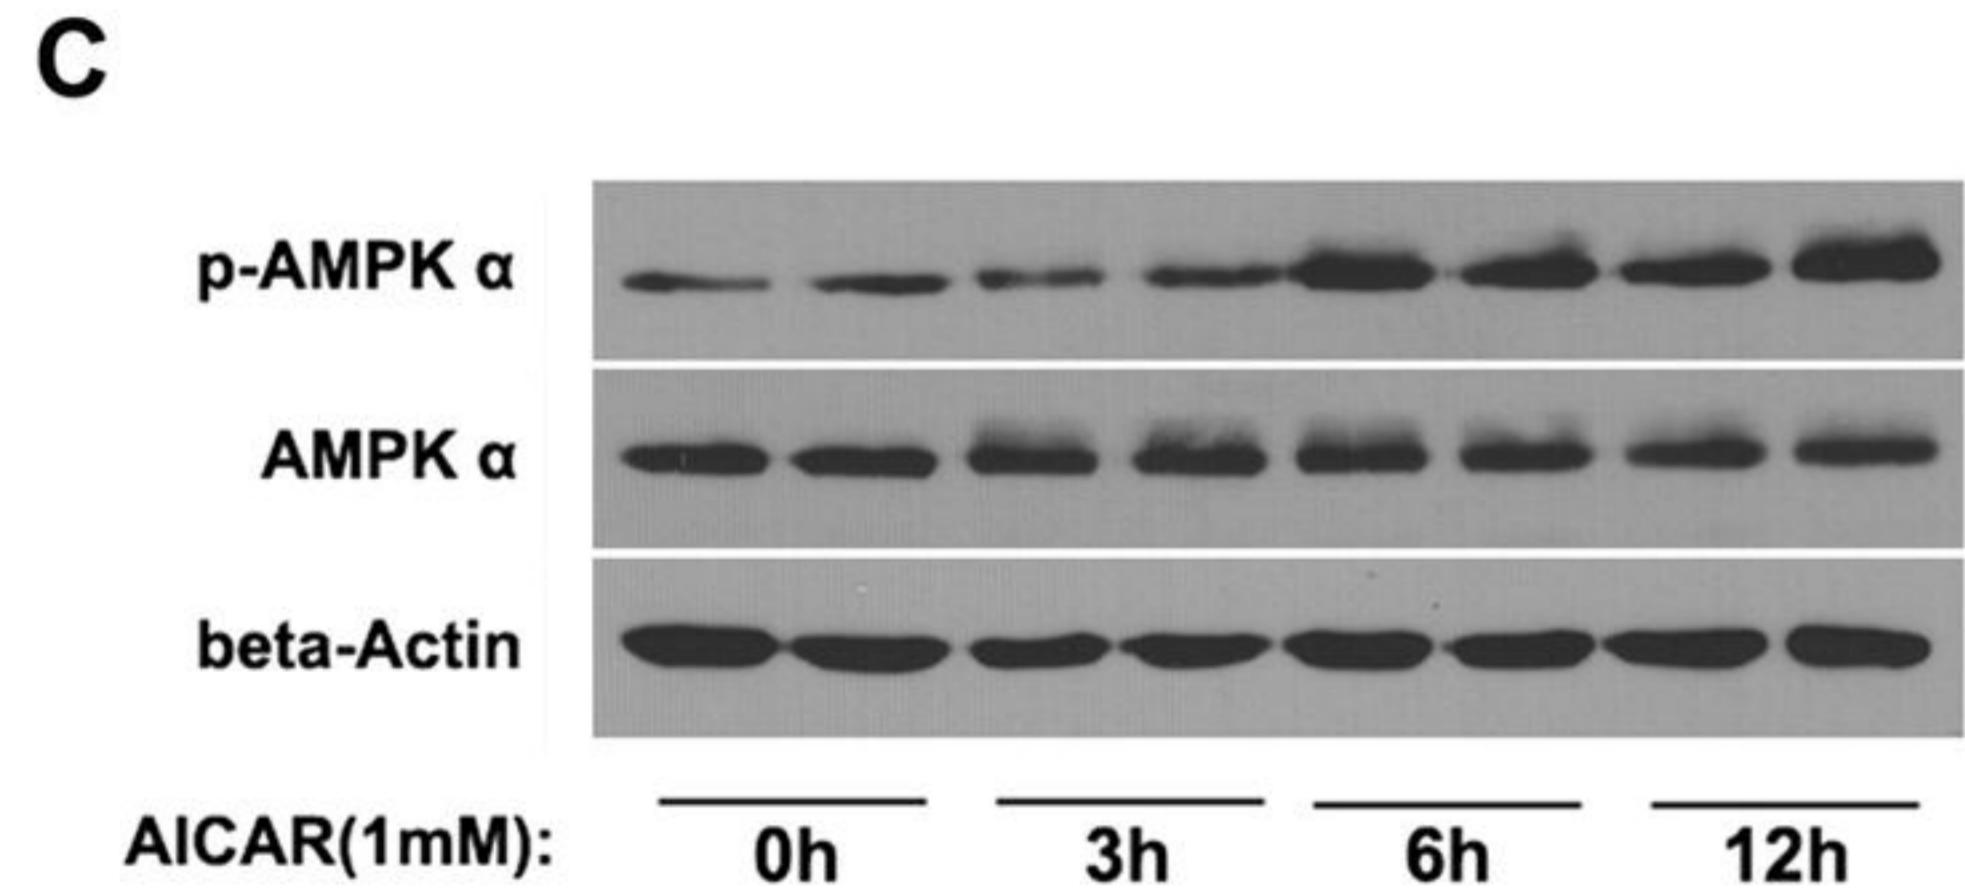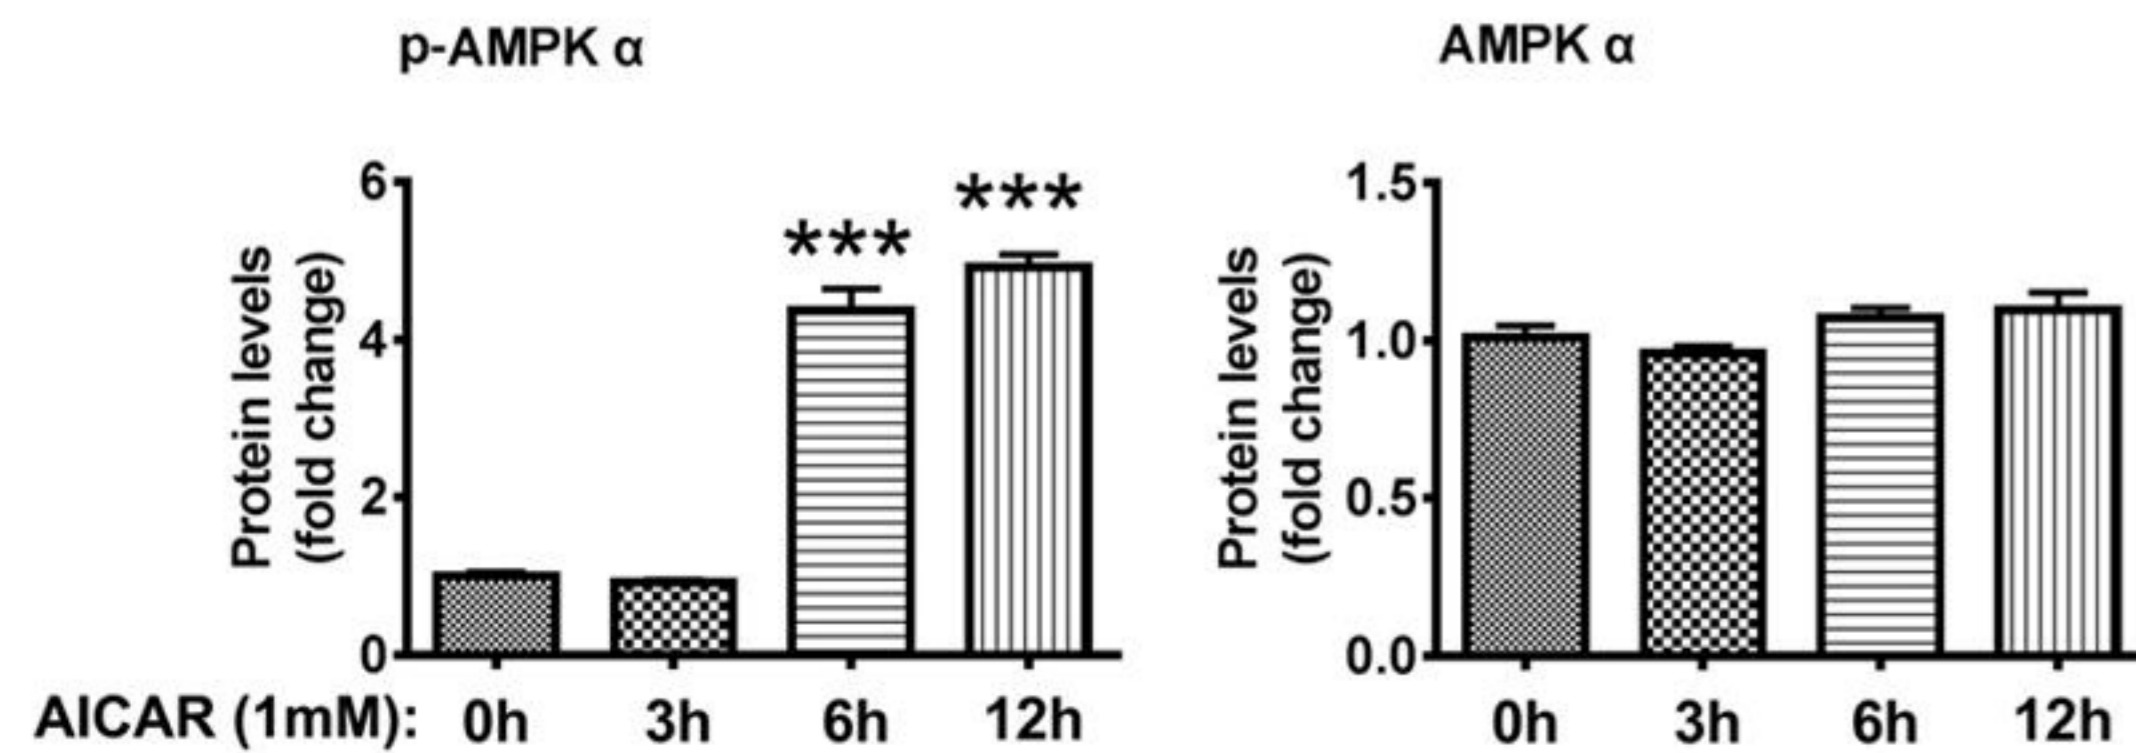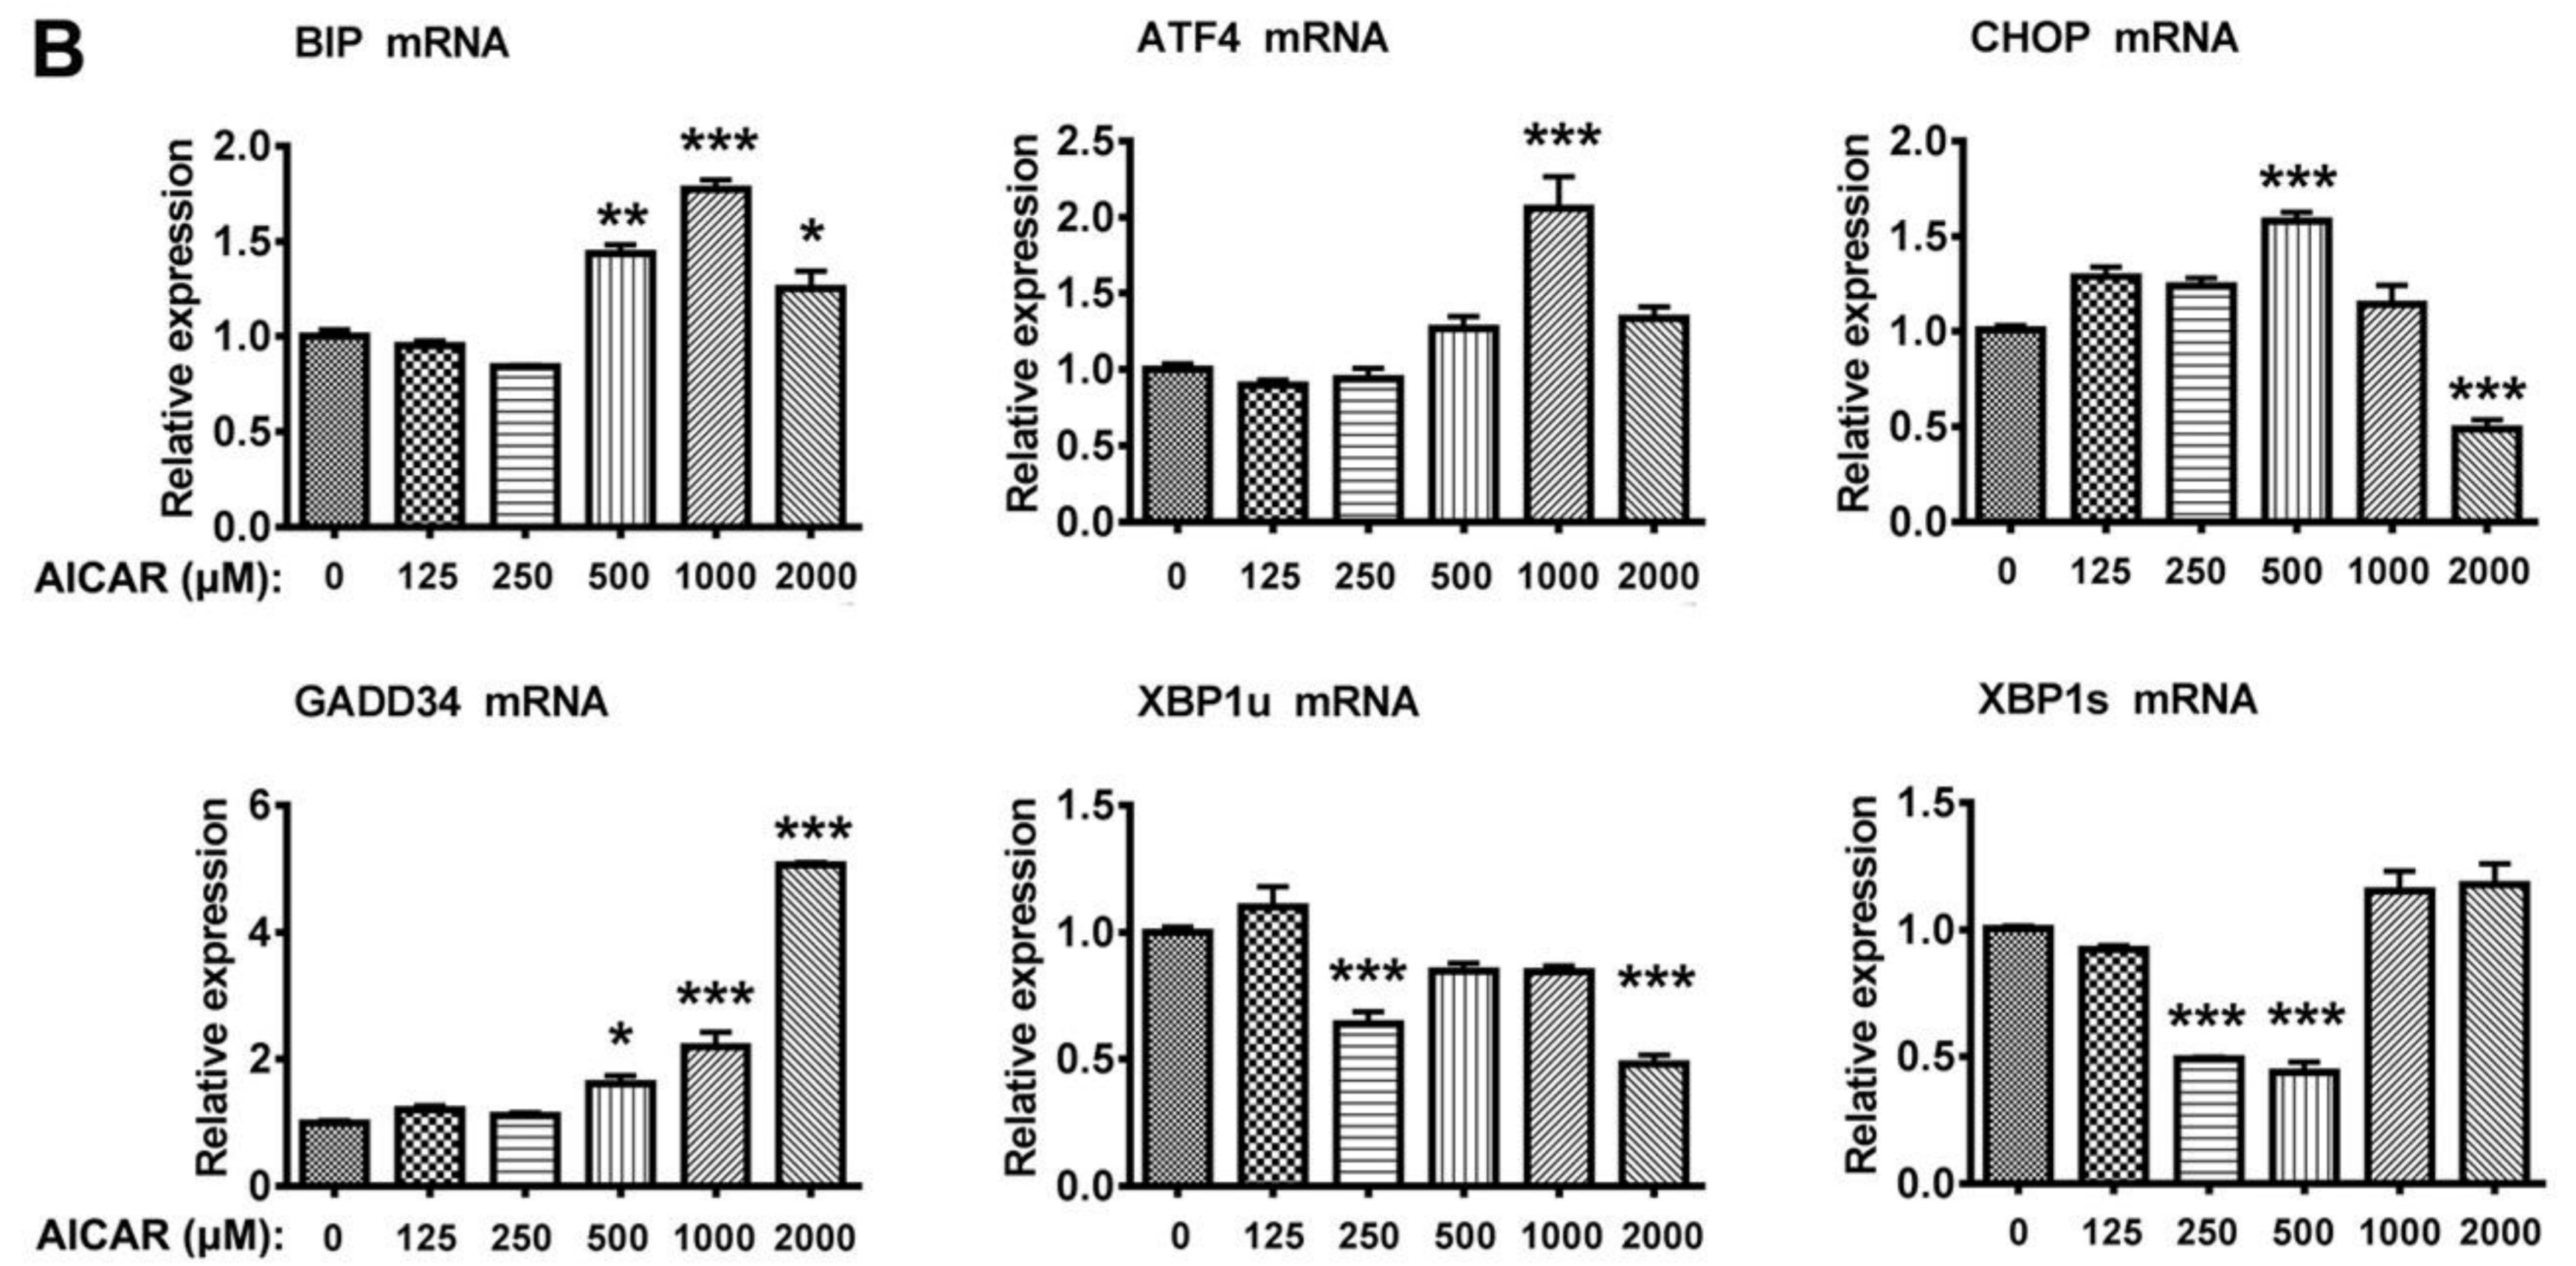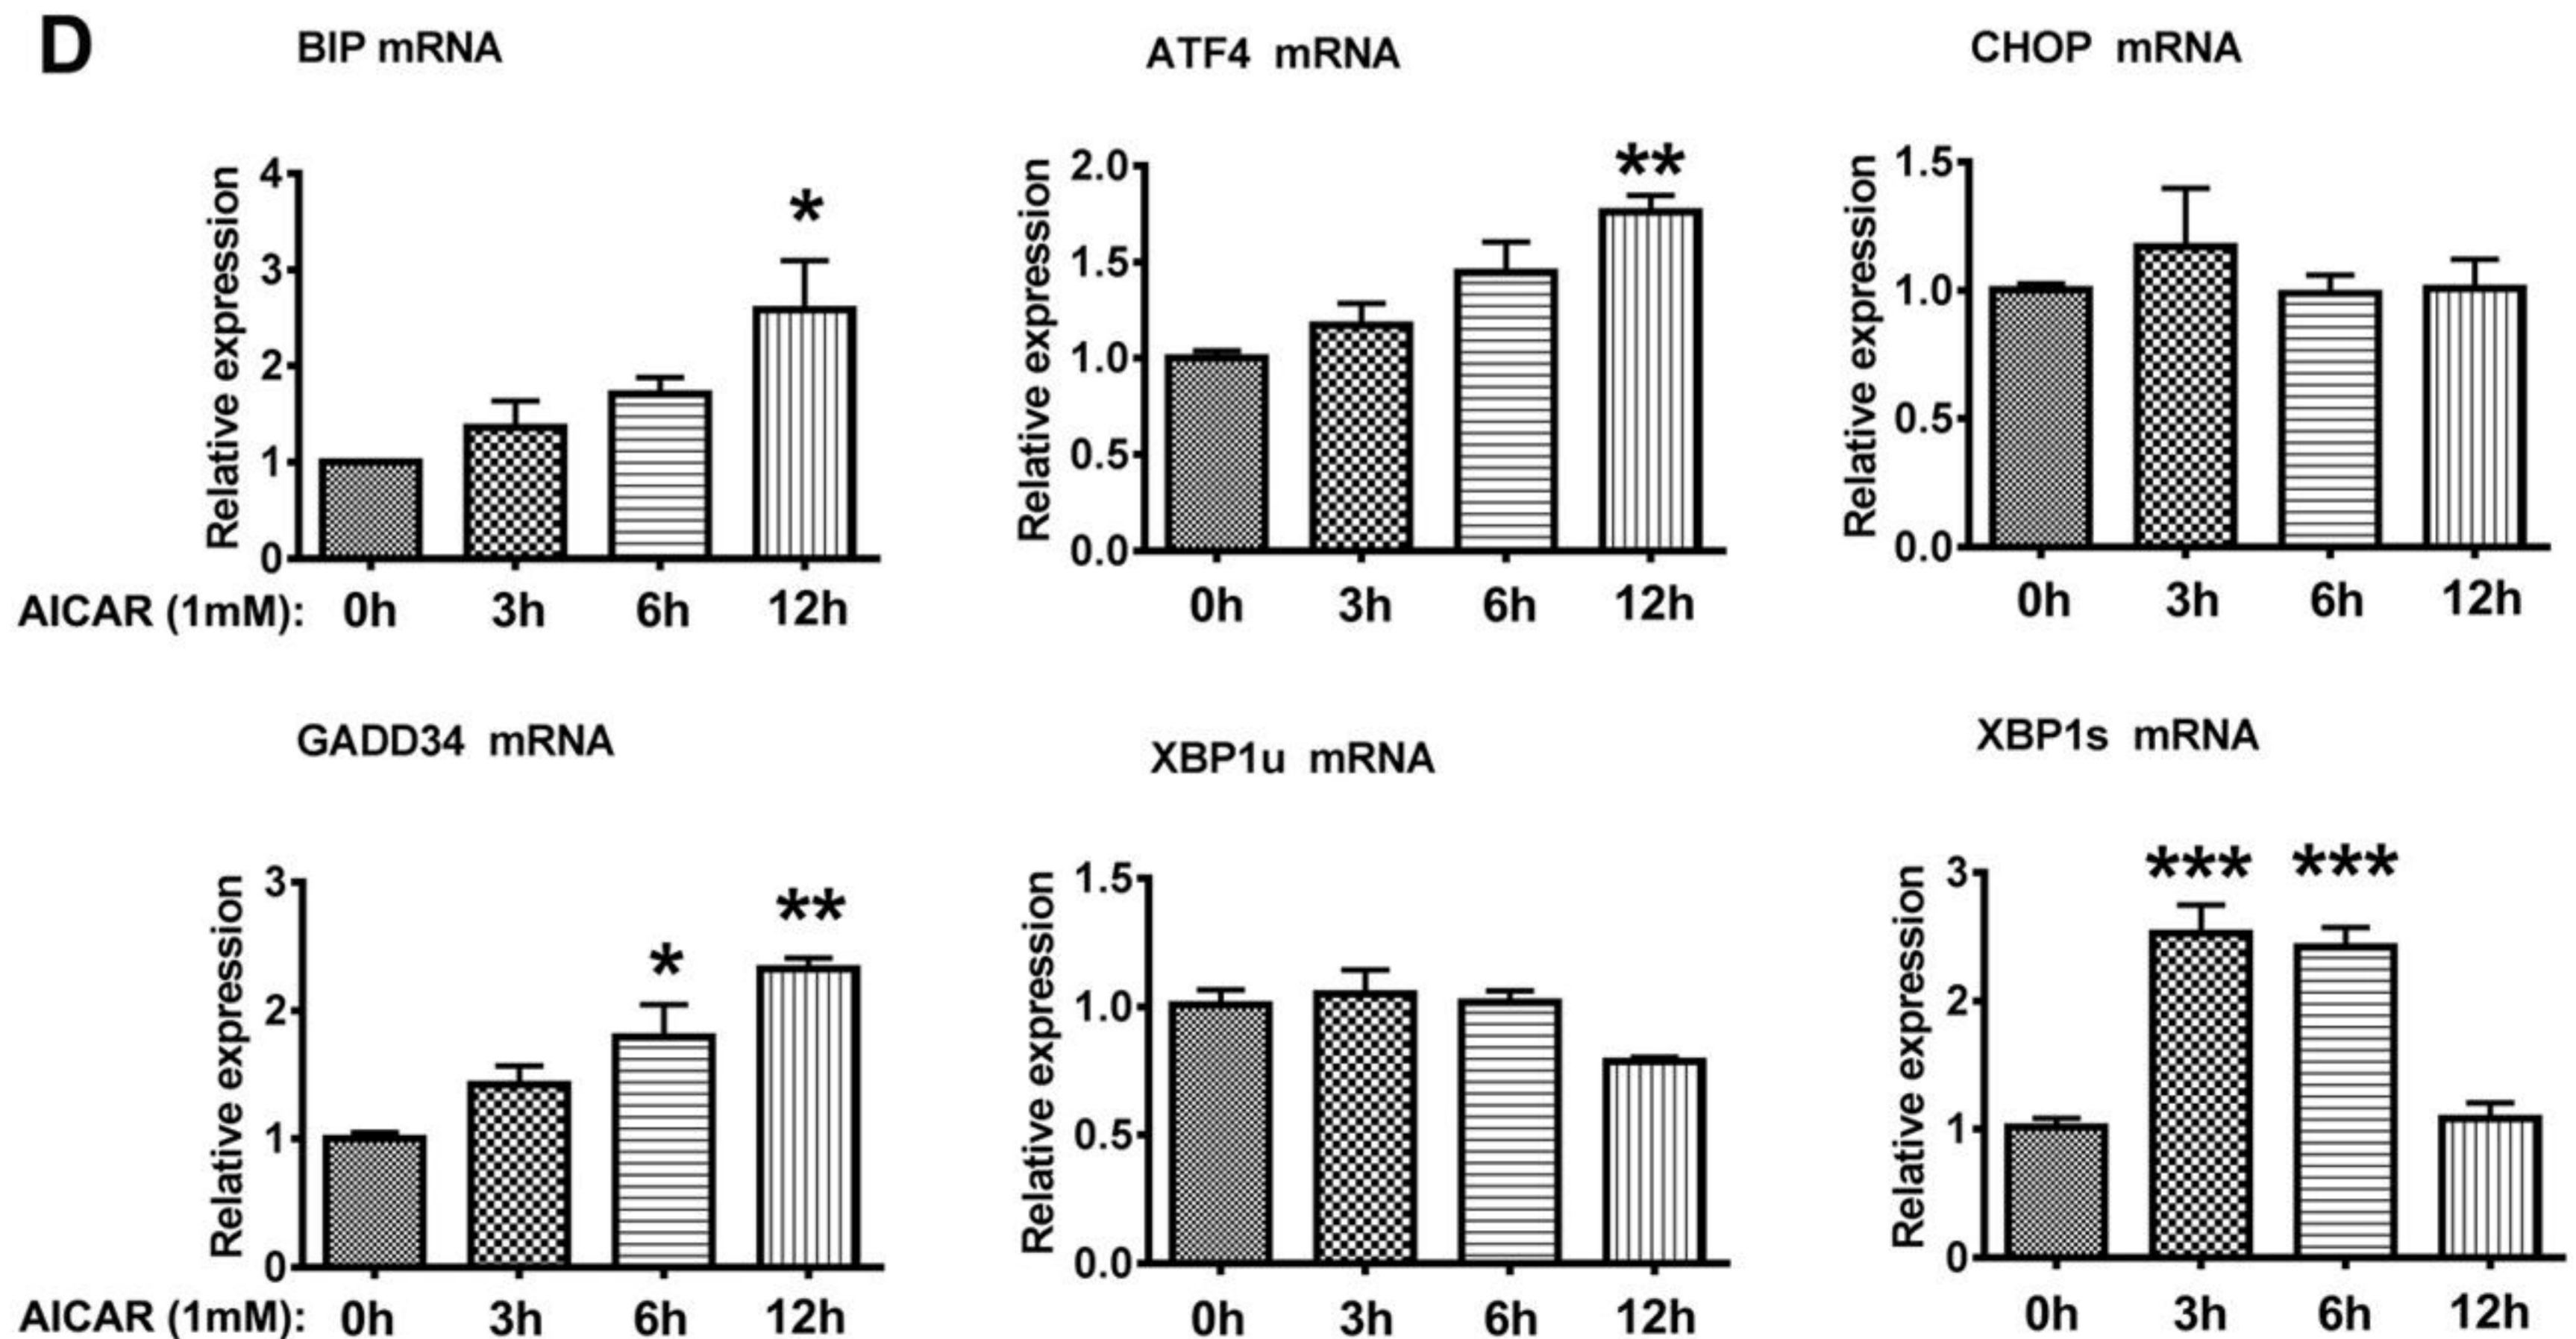

Source: https://www.biorxiv.org/content/10.1101/2021.10.12.464004.full.pdf
